# Supplementary material for: The genetic and phenotypic spectra of adult genetic leukoencephalopathies in a cohort of 309 patients
Source: PubMed Central journal article supplement — Brain. 2022 Nov 16;146(6):2364–76. doi: 10.1093/brain/awac426 (PMC10232248; doi:10.1093/brain/awac426), 2022-11-16

# The genetic and phenotypic spectra of adult genetic leukoencephalopathies in a cohort of 309 patients

## SUPPLEMENTARY MATERIALS

| Section               | Description                                                                                                                                 | Pages |
|-----------------------|---------------------------------------------------------------------------------------------------------------------------------------------|-------|
| Supplementary Tables  |                                                                                                                                             | 2-24  |
|                       | Supplementary Table 1: List of genes reported to be associated with genetic leukoencephalopathies                                           | 2-10  |
|                       | Supplementary Table 2: Clinical and imaging features of hereditary nonvascular leukoencephalopathy in our cohort                            | 11    |
|                       | Supplementary Table 3: Novel pathogenic or likely pathogenic variants of <i>NOTCH3</i> gene identified in our cohort                        | 12    |
|                       | Supplementary Table 4: Mutations identified in CADASIL patients in our cohort                                                               | 13    |
|                       | Supplementary Table 5: Heterozygous <i>HTRA1</i> mutations identified in our cohort                                                         | 14    |
|                       | Supplementary Table 6: Heterozygous <i>COL4A1/2</i> mutations identified in our cohort                                                      | 15    |
|                       | Supplementary Table 7: Clinical and genetic features of patients of myelin disorders identified in our cohort                               | 16-17 |
|                       | Supplementary Table 8: Clinical and genetic features of ALD patients identified in our cohort                                               | 18    |
|                       | Supplementary Table 9: Clinical and genetic features of NIID patients identified in our cohort                                              | 19-20 |
|                       | Supplementary Table 10: Clinical and genetic features of patients of other leuko-axonopathies identified in our cohort                      | 21-22 |
|                       | Supplementary Table 11: Clinical and genetic features of patients with heterozygous mutations in <i>CSF1R</i> gene identified in our cohort | 23    |
|                       | Supplementary Table 12: Clinical and genetic features of astrocytopathies patients identified in our cohort                                 | 24    |
| Supplementary Figures |                                                                                                                                             | 25-26 |
|                       | Supplementary Figure 1 The imaging appearance of the patient with LBSL.                                                                     | 25    |
|                       | Supplementary Figure 2 Punctate diffusion restriction in patients with LBSL, ALSP, and AARS2-related leukodystrophy                         | 26    |

**Supplementary Table 1: List of genes reported to be associated with genetic leukoencephalopathies**

| Gene                       | Disorder name                                                                           | MIM#   | Inheritance pattern |
|----------------------------|-----------------------------------------------------------------------------------------|--------|---------------------|
| GJA1                       | Oculodentodigital dysplasia                                                             | 164200 | AD, AR              |
| PLP1                       | Pelizaeus-Merzbacher disease                                                            | 312080 | XLR                 |
| GJC2                       | Leukodystrophy, hypomyelinating, 2                                                      | 608804 | AR                  |
| MT-ATP6                    | Mitochondrial complex deficiencies due to mitochondrial DNA variants                    | -      | MIT                 |
| MT-ND3                     |                                                                                         | -      | MIT                 |
| MT-ND5                     |                                                                                         | -      | MIT                 |
| MT-ND6                     |                                                                                         | -      | MIT                 |
| MT-CO3                     |                                                                                         | -      | MIT                 |
| MT-ND1                     |                                                                                         | -      | MIT                 |
| MT-ND2                     |                                                                                         | -      | MIT                 |
| MT-ND4                     |                                                                                         | -      | MIT                 |
| MT-TI                      | Leigh syndrome due to mitochondrial DNA variants                                        | -      | MIT                 |
| MT-TK                      |                                                                                         | -      | MIT                 |
| MT-TL1                     |                                                                                         | -      | MIT                 |
| MT-TL2                     |                                                                                         | -      | MIT                 |
| MT-TV                      |                                                                                         | -      | MIT                 |
| MT-TW                      |                                                                                         | -      | MIT                 |
| MT-TL1                     | MELAS                                                                                   | -      | MIT                 |
| MT-ND5                     |                                                                                         | -      | MIT                 |
| MT-TC                      |                                                                                         | -      | MIT                 |
| MT-TF                      |                                                                                         | -      | MIT                 |
| MT-TH                      |                                                                                         | -      | MIT                 |
| MT-TK                      |                                                                                         | -      | MIT                 |
| MT-TL2                     |                                                                                         | -      | MIT                 |
| MT-TQ                      |                                                                                         | -      | MIT                 |
| MT-TV                      |                                                                                         | -      | MIT                 |
| MT-TW                      |                                                                                         | -      | MIT                 |
| MT-TS1                     |                                                                                         | -      | MIT                 |
| MT-ND1                     |                                                                                         | -      | MIT                 |
| MT-TS2                     |                                                                                         | -      | MIT                 |
| MT-ND6                     |                                                                                         | -      | MIT                 |
| MT-CO2                     |                                                                                         | -      | MIT                 |
| MT-CO3                     | -                                                                                       | MIT    |                     |
| MT-CYB                     | -                                                                                       | MIT    |                     |
| Mitochondrial DNA deletion | Kearns Sayre syndrome                                                                   | 530000 | MIT                 |
| CPS1                       | Carbamoylphosphate synthetase I deficiency                                              | 237300 | AR                  |
| OTC                        | Ornithine transcarbamylase deficiency                                                   | 311250 | XLR                 |
| NAGS                       | N-acetylglutamate synthase deficiency                                                   | 237310 | AR                  |
| SLC25A15                   | Hyperomithinemia-hyperammonemia-homocitrullinemia syndrome                              | 238970 | AR                  |
| PDHA1                      | Pyruvate Dehydrogenase deficiency                                                       | 312170 | XLD                 |
| MPV17                      | Mitochondrial DNA depletion syndrome 6 (hepatocerebral type)                            | 256810 | AR                  |
| LRPPRC                     | Leigh syndrome, French-Canadian type                                                    | 220111 | AR                  |
| BOLA3                      | Multiple mitochondrial dysfunctions syndrome 2 with hyperglycinemia                     | 614299 | AR                  |
| NFU1                       | Multiple mitochondrial dysfunctions syndrome 1                                          | 605711 | AR                  |
| IBA57                      | Multiple mitochondrial dysfunctions syndrome 3                                          | 615330 | AR                  |
| ISCA1                      | Multiple mitochondrial dysfunctions syndrome 5                                          | 617613 | AR                  |
| PMPCB                      | Multiple mitochondrial dysfunctions syndrome 6                                          | 617954 | AR                  |
| ISCA2                      | Multiple mitochondrial dysfunctions syndrome 4                                          | 616370 | AR                  |
| FDX2                       | Mitochondrial myopathy, episodic, with optic atrophy and reversible leukoencephalopathy | 251900 | AR                  |
| PC                         | Pyruvate carboxylase deficiency                                                         | 266150 | AR                  |

|         |                                                                    |        |        |
|---------|--------------------------------------------------------------------|--------|--------|
| CLPP    | Perrault syndrome 3                                                | 614129 | AR     |
| MMADHC  | Methylmalonic aciduria and homocystinuria                          | 277410 | AR     |
| HSPD1   | Leukodystrophy, hypomyelinating, 4                                 | 612233 | AR     |
| NDUFA10 | Mitochondrial complex I deficiency, nuclear type 22                | 618243 | AR     |
| NDUFAF3 | Mitochondrial complex I deficiency, nuclear type 18                | 618240 | AR     |
| TIMMDC1 | Mitochondrial complex I deficiency, nuclear type 31                | 618251 | AR     |
| NDUFAF2 | Mitochondrial complex I deficiency, nuclear type 10                | 618233 | AR     |
| NDUFAF4 | Mitochondrial complex I deficiency, nuclear type 15                | 618237 | AR     |
| NDUFS1  | Mitochondrial complex I deficiency, nuclear type 5                 | 618226 | AR     |
| NDUFS4  | Mitochondrial complex I deficiency, nuclear type 1                 | 252010 | AR     |
| NDUFA2  | ?Mitochondrial complex I deficiency, nuclear type 13               | 618235 | AR     |
| NDUFV1  | Mitochondrial complex I deficiency, nuclear type 4                 | 618225 | AR     |
| NDUFS8  | Mitochondrial complex I deficiency, nuclear type 2                 | 618222 | AR     |
| NUBPL   | Mitochondrial complex I deficiency, nuclear type 21                | 618242 | AR     |
| NDUFAF6 | Mitochondrial complex I deficiency, nuclear type 17                | 618239 | AR     |
| NDUF8   | Mitochondrial complex I deficiency, nuclear type 32                | 618252 | AR     |
| NDUFS3  | Mitochondrial complex I deficiency, nuclear type 8                 | 618230 | AR     |
| FOXRED1 | Mitochondrial complex I deficiency, nuclear type 19                | 618241 | AR     |
| NDUFA9  | Mitochondrial complex I deficiency, nuclear type 26                | 618247 | AR     |
| NDUFA12 | ?Mitochondrial complex I deficiency, nuclear type 23               | 618244 | AR     |
| MTFMT   | Mitochondrial complex I deficiency, nuclear type 27                | 618248 | AR     |
| NDUFV2  | Mitochondrial complex I deficiency, nuclear type 7                 | 618229 | AR     |
| NDUFS7  | Mitochondrial complex I deficiency, nuclear type 3                 | 618224 | AR     |
| NDUFAF5 | Mitochondrial complex I deficiency, nuclear type 16                | 618238 | AR     |
| NDUFA6  | Mitochondrial complex I deficiency, nuclear type 33                | 618253 | AR     |
| NDUFA1  | Mitochondrial complex I deficiency, nuclear type 12                | 301020 | XLR    |
| SDHA    | Mitochondrial complex II deficiency                                | 252011 | AR     |
| SDHB    |                                                                    | -      | AR     |
| SDHAF1  |                                                                    | 252011 | AR     |
| SDHD    |                                                                    | 252011 | AR     |
| BCS1L   |                                                                    | 124000 | AR     |
| TTC19   | Mitochondrial complex III deficiency, nuclear type 1               | 615157 | AR     |
| LYRM7   | Mitochondrial complex III deficiency, nuclear type 2               | 615838 | AR     |
| COX20   | Mitochondrial complex IV deficiency                                | 220110 | AR     |
| COX8A   |                                                                    | 220110 | AR     |
| COX14   |                                                                    | 220110 | AR     |
| SCO1    |                                                                    | 220110 | AR     |
| COX10   |                                                                    | 220110 | AR     |
| TACO1   |                                                                    | 220110 | AR     |
| PET100  |                                                                    | 220110 | AR     |
| APOPT1  |                                                                    | 220110 | AR     |
| COX6B1  |                                                                    | 220110 | AR     |
| TMEM70  |                                                                    | 614052 | AR     |
| ATPAF2  | ?Mitochondrial complex V (ATP synthase) deficiency, nuclear type 2 | 604273 | AR     |
| ATP5A1  | ?Mitochondrial complex V (ATP synthase) deficiency, nuclear type 1 | 615228 | AR     |
| ATP5E   | ?Mitochondrial complex V (ATP synthase) deficiency, nuclear type 4 | 614053 | AR     |
| SURF1   | ?Mitochondrial complex V (ATP synthase) deficiency, nuclear type 3 | 614053 | AR     |
| SURF1   | Leigh syndrome, due to COX IV deficiency                           | 256000 | AR, Mi |
| COX15   | Leigh syndrome due to cytochrome c oxidase deficiency              | 256000 | AR, Mi |
| PNPT1   | Combined oxidative phosphorylation deficiency 13                   | 614932 | AR     |
| GFM1    | Combined oxidative phosphorylation deficiency 1                    | 609060 | AR     |
| MTO1    | Combined oxidative phosphorylation deficiency 10                   | 614702 | AR     |
| MRPS2   | Combined oxidative phosphorylation deficiency 36                   | 617950 | AR     |
| MRPS22  | Combined oxidative phosphorylation deficiency 5                    | 611719 | AR     |

|          |                                                                                                    |        |        |
|----------|----------------------------------------------------------------------------------------------------|--------|--------|
| RMND1    | Combined oxidative phosphorylation deficiency 11                                                   | 614922 | AR     |
| MTFMT    | Combined oxidative phosphorylation deficiency 15                                                   | 614947 | AR     |
| TSFM     | Combined oxidative phosphorylation deficiency 3                                                    | 610505 | AR     |
| FASTKD2  | Combined oxidative phosphorylation deficiency 44                                                   | 618855 | AR     |
| C12orf65 | Combined oxidative phosphorylation deficiency 7                                                    | 613559 | AR     |
| TRMT5    | Combined oxidative phosphorylation deficiency 26                                                   | 616539 | AR     |
| MRPS34   | Combined oxidative phosphorylation deficiency 32                                                   | 617664 | AR     |
| TUFM     | Combined oxidative phosphorylation deficiency 4                                                    | 610678 | AR     |
| ELAC2    | Combined oxidative phosphorylation deficiency 17                                                   | 615440 | AR     |
| GTPBP3   | Combined oxidative phosphorylation deficiency 23                                                   | 616198 | AR     |
| TXN2     | ?Combined oxidative phosphorylation deficiency 29                                                  | 616811 | AR     |
| GFM2     | Combined oxidative phosphorylation deficiency 39                                                   | 618397 | AR     |
| SUCLG1   | Mitochondrial DNA depletion syndrome 9 (encephalomyopathic type with methylmalonic aciduria)       | 245400 | AR     |
| RRM2B    | Mitochondrial DNA depletion syndrome 8A and 8B                                                     | 612075 | AR     |
| SUCLA2   | Mitochondrial DNA depletion syndrome 5 (encephalomyopathic with or without methylmalonic aciduria) | 612073 | AR     |
| POLG     | Mitochondrial DNA depletion syndrome 4B (MNGIE type)                                               | 613662 | AR     |
| POLG     | Mitochondrial DNA depletion syndrome 4A (Alpers type)                                              | 203700 | AR     |
| TK2      | Mitochondrial DNA depletion syndrome 2 (myopathic type)                                            | 609560 | AR     |
| DGUOK    | Mitochondrial DNA depletion syndrome 3 (hepatocerebral type)                                       | 251880 | AR     |
| TYMP     | Mitochondrial DNA depletion syndrome 1 (MNGIE type)                                                | 603041 | AR     |
| FBXL4    | Mitochondrial DNA depletion syndrome 13 (encephalomyopathic type)                                  | 615471 | AR     |
| SPG7     | Spastic paraplegia 7 (SPG7)                                                                        | 607259 | AD, AR |
| COA7     | Spinocerebellar ataxia, autosomal recessive, with axonal neuropathy 3                              | 618387 | AR     |
| DEGS1    | Leukodystrophy, hypomyelinating, 18                                                                | 618404 | AR     |
| GLRX5    | Spasticity, childhood-onset, with hyperglycinemia                                                  | 616859 | AR     |
| SCO2     | Cardioencephalomyopathy, fatal infantile, due to cytochrome c oxidase deficiency 1                 | 604377 | AR     |
| NADK2    | ?2,4-dienoyl-CoA reductase deficiency                                                              | 616034 | AR     |
| NAXE     | Encephalopathy, progressive, early-onset, with brain edema and/or leukoencephalopathy              | 617186 | AR     |
| NAXD     | Encephalopathy, progressive, early-onset, with brain edema and/or leukoencephalopathy, 2           | 618321 | AR     |
| TIMM50   | 3-methylglutaconic aciduria, type IX                                                               | 617698 | AR     |
| SLC25A46 | Neuropathy, hereditary motor and sensory, type VIB                                                 | 616505 | AR     |
| ETFDH    | Glutaric acidemia IIC                                                                              | 231680 | AR     |
| ETFA     |                                                                                                    | 231680 | AR     |
| ETFB     |                                                                                                    | 231680 | AR     |
| MSTO1    | Myopathy, mitochondrial, and ataxia                                                                | 617675 | AD, AR |
| MDH2     | Epileptic encephalopathy, early infantile, 51                                                      | 617339 | AR     |
| SLC17A5  | Free salic acid storage disorders                                                                  | 269920 | AR     |
| FUCA1    | Fucosidosis                                                                                        | 230000 | AR     |
| GALC     | Krabbe disease                                                                                     | 245200 | AR     |
| ARSA     | Metachromatic leukodystrophy                                                                       | 250100 | AR     |
| SUMF1    | Multiple sulfatase deficiency                                                                      | 272200 | AR     |
| AGA      | Aspartylglucosaminuria                                                                             | 208400 | AR     |
| PPT1     | Ceroid lipofuscinosis, neuronal, 1                                                                 | 256730 | AR     |
| MFSD8    | Ceroid lipofuscinosis, neuronal, 7                                                                 | 610951 | AR     |
| CLN8     | Ceroid lipofuscinosis, neuronal, 8                                                                 | 600143 | AR     |
| CLN8     | Ceroid lipofuscinosis, neuronal, 8, Northern epilepsy variant                                      | 610003 | AR     |
| CTSD     | Ceroid lipofuscinosis, neuronal, 10                                                                | 610127 | AR     |
| TPP1     | Ceroid lipofuscinosis, neuronal, 2                                                                 | 204500 | AR     |
| CTSF     | Ceroid lipofuscinosis, neuronal, 13, Kufs type                                                     | 615362 | AR     |
| CLN5     | Ceroid lipofuscinosis, neuronal, 5                                                                 | 256731 | AR     |
| CLN6     | Ceroid lipofuscinosis, neuronal, Kufs type, adult onset                                            | 204300 | AR     |
| CLN6     | Ceroid lipofuscinosis, neuronal, 6                                                                 | 601780 | AR     |
| CLN3     | Ceroid lipofuscinosis, neuronal, 3                                                                 | 204200 | AR     |

|         |                                                               |        |     |
|---------|---------------------------------------------------------------|--------|-----|
| GRN     | Ceroid lipofuscinosis, neuronal, 11                           | 614706 | AR  |
| DNAJC5  | Ceroid lipofuscinosis, neuronal, 4, Parry type                | 162350 | AD  |
| CLN9    | Ceroid lipofuscinosis, neuronal, 9                            | 609055 | AR  |
| VPS11   | VPS11- related hypomyelination                                | 616683 | AR  |
| PSAP    | Metachromatic leukodystrophy                                  | 249900 | AR  |
| GLB1    | GM1-gangliosidosis, type III                                  | 230650 | AR  |
| HEXA    | Tay-Sachs disease                                             | 272800 | AR  |
| NPC2    | Niemann-Pick type C2                                          | 607625 | AR  |
| NPC1    | Niemann-Pick type C1                                          | 257220 | AR  |
| MAN2B1  | Mannosidosis, alpha-, types I and II                          | 248500 | AR  |
| GM2A    | GM2-gangliosidosis, AB variant                                | 272750 | AR  |
| IDS     | Mucopolysaccharidosis II                                      | 309900 | XLR |
| IDUA    | Mucopolysaccharidosis Ih                                      | 607014 | AR  |
| CTSA    | Galactosialidosis                                             | 256540 | AR  |
| PEX1    | Peroxisome biogenesis disorder 1A (Zellweger)                 | 214100 | AR  |
| PEX1    | Peroxisome biogenesis disorder 1B                             | 601539 | AR  |
| PEX2    | Peroxisome biogenesis disorder 5A                             | 614866 | AR  |
| PEX2    | Peroxisome biogenesis disorder 5B                             | 614867 | AR  |
| PEX3    | Peroxisome biogenesis disorder 10A                            | 614882 | AR  |
| PEX6    | Peroxisome biogenesis disorder 4A and                         | 614862 | AR  |
| PEX6    | Peroxisome biogenesis disorder 4B                             | 614863 | AR  |
| PEX10   | Peroxisome biogenesis disorder 6A (Zellweger)                 | 614870 | AR  |
| PEX10   | Peroxisome biogenesis disorder 6B                             | 614871 | AR  |
| PEX12   | Peroxisome biogenesis disorder 3A                             | 614859 | AR  |
| PEX12   | Peroxisome biogenesis disorder 3B                             | 266510 | AR  |
| PEX11B  | ?Peroxisome biogenesis disorder 14B                           | 614920 | AR  |
| PEX16   | Peroxisome biogenesis disorder 8A (Zellweger)                 | 614876 | AR  |
| PEX14   | Peroxisome biogenesis disorder 13A (Zellweger)                | 614887 | AR  |
| PEX19   | Peroxisome biogenesis disorder 12A (Zellweger)                | 614886 | AR  |
| PEX26   | Peroxisome biogenesis disorder 7A (Zellweger)                 | 614872 | AR  |
| PEX5    | Peroxisome biogenesis disorder 2A (Zellweger)                 | 214110 | AR  |
| HSD17B4 | D-bifunctional protein deficiency                             | 261515 | AR  |
| ACOX1   | Peroxisomal acyl-CoA oxidase deficiency                       | 264470 | AR  |
| SCP2    | ?Leukoencephalopathy with dystonia and motor neuropathy       | 613724 | AR  |
| ABCD1   | X-linked adrenoleukodystrophy                                 | 300100 | XLR |
| AMACR   | $\alpha$ -Methylacyl-CoA racemase deficiency                  | 614307 | AR  |
| HSD17B4 | Perrault syndrome 1                                           | 233400 | AR  |
| ASPA    | Canavan disease                                               | 271900 | AR  |
| L2HGDH  | L-2-hydroxyglutaric aciduria                                  | 236792 | AR  |
| D2HGDH  | D-2-hydroxyglutaric aciduria                                  | 600721 | AR  |
| SLC25A1 | Combined D-2- and L-2-hydroxyglutaric aciduria                | 615182 | AR  |
| PAH     | Phenylketonuria                                               | 261600 | AR  |
| QDPR    | Hyperphenylalaninemia, BH4-deficient, C                       | 261630 | AR  |
| DNAJC12 | Hyperphenylalaninemia, mild, non-BH4-deficient                | 617384 | AR  |
| HMGCL   | HMG-CoA lyase deficiency                                      | 246450 | AR  |
| MTHFR   | Homocystinuria                                                | 236250 | AR  |
| MMACHC  | Methylmalonic aciduria and homocystinuria, cblC type          | 277400 | AR  |
| PRDX1   |                                                               | 277400 | AR  |
| LMBRD1  | Methylmalonic aciduria and homocystinuria, cblF type          | 277380 | AR  |
| ABCD4   | Methylmalonic aciduria and homocystinuria, cblJ type          | 614857 | AR  |
| FOLR1   | Neurodegeneration due to cerebral folate transport deficiency | 613068 | AR  |
| ABAT    | GABA-transaminase deficiency                                  | 613163 | AR  |
| BCKDHA  | Maple syrup urine disease                                     | 248600 | AR  |

|         |                                                                                                                  |        |     |
|---------|------------------------------------------------------------------------------------------------------------------|--------|-----|
| BCKDHB  |                                                                                                                  | 248600 | AR  |
| DBT     |                                                                                                                  | 248600 | AR  |
| PHGDH   | Phosphoglycerate dehydrogenase deficiency                                                                        | 601815 | AR  |
| PSAT1   | Phosphoserine aminotransferase deficiency                                                                        | 610992 | AR  |
| GCDH    | Glutaricaciduria, type I                                                                                         | 231670 | AR  |
| PYCR2   | Leukodystrophy, hypomyelinating, 10                                                                              | 616420 | AR  |
| AUH     | 3-methylglutaconic aciduria, type I                                                                              | 250950 | AR  |
| DPYD    | Dihydropyrimidine dehydrogenase deficiency                                                                       | 274270 | AR  |
| TPK1    | Thiamine metabolism dysfunction syndrome 5 (episodic encephalopathy type)                                        | 614458 | AR  |
| ALDH5A1 | Succinic semialdehyde dehydrogenase deficiency                                                                   | 271980 | AR  |
| AHCY    | Hypermethioninemia with deficiency of S-adenosylhomocysteine hydrolase                                           | 613752 | AR  |
| ASNS    | Asparagine synthetase deficiency                                                                                 | 615574 | AR  |
| MTR     | Homocystinuria-megaloblastic anemia, cblG complementation type                                                   | 250940 | AR  |
| GLS     | Epileptic encephalopathy, early infantile, 71                                                                    | 618328 | AR  |
| GCSH    | Glycine encephalopathy                                                                                           | 605899 | AR  |
| PRMT7   | Short stature, brachydactyly, intellectual developmental disability, and seizures                                | 617157 | AR  |
| ELOVL1  | Ichthyosis, acanthosis nigricans, hypomyelination, spastic paraplegia, high frequency deafness and optic atrophy | 618527 | AD  |
| PLA2G6  | Infantile neuroaxonal dystrophy 1                                                                                | 256600 | AR  |
| FAR1    | Peroxisomal fatty acyl-CoA reductase 1 disorder                                                                  | 616154 | AR  |
| ACER3   | ?Leukodystrophy, progressive, early childhood-onset                                                              | 617762 | AR  |
| PIGA    | Multiple congenital anomalies-hypotonia-seizures syndrome 2                                                      | 300868 | XLR |
| PIGN    | Multiple congenital anomalies-hypotonia-seizures syndrome 1                                                      | 614080 | AR  |
| PIGQ    | Epileptic encephalopathy, early infantile, 77                                                                    | 618548 | AR  |
| PIGB    | Epileptic encephalopathy, early infantile, 80                                                                    | 618580 | AR  |
| RPIA    | Ribose 5 phosphate isomerase deficiency                                                                          | 608611 | AR  |
| GLYCTK  | D-glycemic aciduria                                                                                              | 220120 | AR  |
| GFPT1   | Myasthenia, congenital, 12, with tubular aggregates                                                              | 610542 | AR  |
| GALT    | Galactosemia                                                                                                     | 230400 | AR  |
| VAC14   | Striatonigral degeneration                                                                                       | 617054 | AR  |
| PLAA    | Neurodevelopmental disorder with progressive microcephaly, spasticity, and brain anomalies                       | 617527 | AR  |
| KIF5A   | Myoclonus, intractable, neonatal                                                                                 | 617235 | AD  |
| RAB11B  | Neurodevelopmental disorder with ataxic gait, absent speech, and decreased cortical white matter                 | 617807 | AD  |
| TRAPPC9 | Mental retardation, autosomal recessive 13                                                                       | 613192 | AR  |
| AP4M1   | Spastic paraplegia 50, autosomal recessive                                                                       | 612936 | AR  |
| ACP33   | Spastic paraplegia 21 (SPG21)                                                                                    | 248900 | AR  |
| RAB27A  | GrisCELLI syndrome, type 2                                                                                       | 607624 | AR  |
| AP5Z1   | Spastic paraplegia 48, autosomal recessive                                                                       | 613647 | AR  |
| BCAP31  | Deafness, dystonia, and cerebral hypomyelination                                                                 | 300475 | XLR |
| STXBP2  | Familial hemophagocytic lymphohistiocytosis 5                                                                    | 613101 | AR  |
| UNC13D  | Familial hemophagocytic lymphohistiocytosis 3                                                                    | 608898 | AR  |
| STX11   | Familial hemophagocytic lymphohistiocytosis 4                                                                    | 603552 | AR  |
| SPG11   | Spastic paraplegia 11                                                                                            | 604360 | AR  |
| DDHD2   | Spastic paraplegia 54, autosomal recessive                                                                       | 615033 | AR  |
| TRAK1   | Epileptic encephalopathy, early infantile, 68                                                                    | 618201 | AR  |
| STXBP1  | Epileptic encephalopathy, early infantile, 4                                                                     | 612164 | AD  |
| VAC14   | Yunis-Varon Syndrome                                                                                             | -      | AR  |
| TBC1D24 | Epileptic encephalopathy, early infantile, 16                                                                    | 615338 | AR  |
| AP4B1   | Spastic paraplegia, 47                                                                                           | 614066 | AR  |
| RAB18   | Warburg micro syndrome 3                                                                                         | 618222 | AR  |
| MLC1    | Megalencephalic leukoencephalopathy with subcortical cysts                                                       | 604004 | AR  |
| LAMA2   | Merosin deficient congenital muscular dystrophy                                                                  | 607855 | AR  |
| POMT1   | Muscular dystrophy-dystroglycanopathy type A, 1                                                                  | 236670 | AR  |
| POMGNT1 | Muscular dystrophy-dystroglycanopathy type A, 3                                                                  | 253280 | AR  |

|          |                                                                                                           |        |     |
|----------|-----------------------------------------------------------------------------------------------------------|--------|-----|
| FKTN     | Muscular dystrophy-dystroglycanopathy type A, 4                                                           | 253800 | AR  |
| FKRP     | Muscular dystrophy-dystroglycanopathy type A, 5                                                           | 613153 | AR  |
| ISPD     | Muscular dystrophy-dystroglycanopathy type A, 7                                                           | 614643 | AR  |
| LARGE1   | Muscular dystrophy-dystroglycanopathy type A, 7                                                           | 613154 | AR  |
| GPR56    | Polymicrogyria, bilateral frontoparietal                                                                  | 615752 | AR  |
| MYRF     | Encephalitis/encephalopathy, mild, with reversible myelin vacuolization                                   | 618113 | AD  |
| MCOLN1   | Mucopolipidosis IV                                                                                        | 252650 | AR  |
| ATP7B    | Wilson disease                                                                                            | 277900 | AR  |
| ATP7A    | Menkes disease                                                                                            | 309400 | XLR |
| CLCN2    | Leukoencephalopathy with ataxia                                                                           | 615651 | AR  |
| SLC13A5  | Epileptic encephalopathy, early infantile, 25                                                             | 615905 | AR  |
| DMPK     | Myotonic dystrophy 1                                                                                      | 160900 | AD  |
| SPTAN1   | Epileptic encephalopathy, early infantile, 5                                                              | 613477 | AD  |
| CLCN4    | Raynaud-Claes syndrome                                                                                    | 300114 | XLD |
| SLC9A6   | Mental retardation, X-linked syndromic, Christianson type                                                 | 300243 | XLD |
| KCNJ2    | Andersen syndrome                                                                                         | 170390 | AD  |
| SLC39A14 | Hyper manganeseemia with dystonia 2                                                                       | 617013 | AR  |
| TBCD     | Encephalopathy, progressive, early-onset, with brain atrophy and thin corpus callosum                     | 617193 | AR  |
| ATP6V1A  | Cutis laxa, autosomal recessive, type IID                                                                 | 617403 | AR  |
| SLC12A5  | Epileptic encephalopathy, early infantile, 34                                                             | 616645 | AR  |
| KCNT1    | Epileptic encephalopathy, early infantile, 14                                                             | 614959 | AD  |
| HCN1     | Epileptic encephalopathy, early infantile, 24                                                             | 615871 | AD  |
| KCNQ2    | Epileptic encephalopathy, early infantile, 7                                                              | 613720 | AD  |
| SLC12A6  | Agenesis of the corpus callosum with peripheral neuropathy                                                | 218000 | AR  |
| SLC6A19  | Hartnup disorder                                                                                          | 234500 | AR  |
| SLC25A22 | Epileptic encephalopathy, early infantile, 3                                                              | 609304 | AR  |
| GABRA2   | Epileptic encephalopathy, early infantile, 78                                                             | 618557 | AD  |
| GABRG2   | Epileptic encephalopathy, early infantile, 74                                                             | 618396 | AD  |
| SLC1A2   | Epileptic encephalopathy, early infantile, 41                                                             | 617105 | AD  |
| GABRB3   | Epileptic encephalopathy, early infantile, 43                                                             | 617113 | AD  |
| GABRA5   | Epileptic encephalopathy, early infantile, 79                                                             | 618559 | AD  |
| SLC16A2  | Allan-Herndon-Dudley syndrome                                                                             | 300523 | XL  |
| OCLN     | Band-like intracranial calcification with simplified gyration and polymicrogyria                          | 251290 | AR  |
| SLC25A12 | Epileptic encephalopathy, early infantile, 39                                                             | 612949 | AR  |
| TMEM63A  | Leukodystrophy, hypomyelinating, 19, transient infantile                                                  | 618688 | AD  |
| SOX2     | Optic nerve hypoplasia and abnormalities of the central nervous system                                    | 206900 | AD  |
| ACTB     | Baraitser-Winter syndrome 1                                                                               | 243310 | AD  |
| PURA     | Mental retardation, autosomal dominant 31                                                                 | 616158 | AD  |
| PCGF2    | Tumpenny-Fry syndrome                                                                                     | 618371 | AD  |
| ZNHIT3   | PEHO syndrome                                                                                             | 260565 | AR  |
| ASXL1    | Bohring-Opitz syndrome                                                                                    | 605039 | AD  |
| SATB2    | Glass syndrome                                                                                            | 612313 | AD  |
| NACC1    | Neurodevelopmental disorder with epilepsy, cataracts, feeding difficulties, and delayed brain myelination | 617393 | AD  |
| NEUROD2  | Epileptic encephalopathy, early infantile, 72                                                             | 618374 | AD  |
| SIN3A    | Witteveen-Kolk syndrome                                                                                   | 613406 | AD  |
| HNRNPU   | Epileptic encephalopathy, early infantile, 51                                                             | 617391 | AD  |
| RNASEH2B | Aicardi-Goutières syndrome type 2                                                                         | 610181 | AR  |
| RNASEH2C | Aicardi-Goutières syndrome type 3                                                                         | 610329 | AR  |
| RNASEH2A | Aicardi-Goutières syndrome type 4                                                                         | 610333 | AR  |
| SAMHD1   | Aicardi-Goutières syndrome type 5                                                                         | 612952 | AR  |
| CTC1     | Cerebroretinal microangiopathy with calcifications and cysts                                              | 612199 | AR  |
| STN1     | Cerebroretinal microangiopathy with calcifications and cysts 2                                            | 617341 | AR  |
| ERCC8    | Cockayne syndrome, type A                                                                                 | 216400 | AR  |

|          |                                                                                                                                      |        |        |
|----------|--------------------------------------------------------------------------------------------------------------------------------------|--------|--------|
| ERCC2    | Xeroderma pigmentosum -Cockayne syndrome complex                                                                                     | 278730 | AR     |
| ERCC3    | Trichothiodystrophy 2, photosensitive                                                                                                | 616390 | AR     |
| GTF2H5   | Trichothiodystrophy 3, photosensitive                                                                                                | 616395 | AR     |
| ERCC6    | Cockayne syndrome type B                                                                                                             | 133540 | AR     |
| ERCC2    | Trichothiodystrophy 1, photosensitive                                                                                                | 601675 | AR     |
| SPG20    | Spastic paraplegia 20 (SPG20)                                                                                                        | 275900 | AR     |
| ADPRHL2  | Neurodegeneration, childhood-onset, stress-induced, with variable ataxia and seizures                                                | 618170 | AR     |
| PRKDC    | Immunodeficiency 26, with or without neurologic abnormalities                                                                        | 615966 | AR     |
| TREX1    | Aicardi-Goutières syndrome type 1                                                                                                    | 225750 | AD, AR |
| POLR3A   | Leukodystrophy, hypomyelinating, 7, with or without oligodontia and/or hypogonadotropic hypogonadism                                 | 607694 | AR     |
| POLR3B   | Pol III related leukodystrophiesLeukodystrophy, hypomyelinating, 8, with or without oligodontia and/or hypogonadotropic hypogonadism | 614381 | AR     |
| EIF2B1   | Childhood ataxia with CNS hypomyelination/vanishing white matter disorder                                                            | 603896 | AR     |
| EIF2B2   |                                                                                                                                      | 603896 | AR     |
| EIF2B3   |                                                                                                                                      | 603896 | AR     |
| EIF2B4   |                                                                                                                                      | 603896 | AR     |
| EIF2B5   |                                                                                                                                      | 603896 | AR     |
| DARS2    | Leukoencephalopathy with brainstem and spinal cord involvement                                                                       | 611105 | AR     |
| EPRS     | Leukodystrophy, hypomyelinating, 15                                                                                                  | 617951 | AR     |
| POLR1C   | Leukodystrophy, hypomyelinating, 11                                                                                                  | 616494 | AR     |
| POLR3K   | Hypomyelinating leukodystrophy                                                                                                       | -      | AR     |
| LARS2    | Perrault syndrome 4                                                                                                                  | 615300 | AR     |
| KARS1    | KARS-related leukodystrophy                                                                                                          | -      | AR     |
| AARS1    | Epileptic encephalopathy, early infantile, 29                                                                                        | 616339 | AR     |
| AIMP1    | Hypomyelinating leukodystrophy 3                                                                                                     | 260600 | AR     |
| EARS2    | Combined oxidative phosphorylation deficiency 12                                                                                     | 614924 | AR     |
| DARS1    | Hypomyelination wit Brainstem and Spinal Cord Involvement and Leg Spasticity (HBSL)                                                  | 615281 | AR     |
| AARS2    | Progressive leukoencephalopathy with ovarian failure                                                                                 | 615889 | AR     |
| WARS2    | Neurodevelopmental disorder, mitochondrial, with abnormal movements and lactic acidosis, with or without seizures                    | 617710 | AR     |
| PARS2    | Epileptic encephalopathy, early infantile, 75                                                                                        | 618437 | AR     |
| AIMP2    | Leukodystrophy, hypomyelinating, 17                                                                                                  | 618006 | AR     |
| ZEB2     | Mowat-Wilson syndrome                                                                                                                | 235730 | AD     |
| FARS2    | Combined oxidative phosphorylation deficiency 14                                                                                     | 614946 | AR     |
| VARs2    | Combined oxidative phosphorylation deficiency 20                                                                                     | 615917 | AR     |
| NARS2    | Combined oxidative phosphorylation deficiency 24                                                                                     | 616239 | AR     |
| MARS2    | ?Combined oxidative phosphorylation deficiency 25                                                                                    | 616430 | AR     |
| CARS2    | Combined oxidative phosphorylation deficiency 27                                                                                     | 616672 | AR     |
| TARS2    | ?Combined oxidative phosphorylation deficiency 21                                                                                    | 615918 | AR     |
| EXOSC8   | Pontocerebellar hypoplasia, type 1C                                                                                                  | 616081 | AR     |
| GEMIN4   | Neurodevelopmental disorder with microcephaly, cataracts, and renal abnormalities                                                    | 617913 | AR     |
| IARS     | Growth retardation, impaired intellectual development, hypotonia, and hepatopathy                                                    | 617093 | AR     |
| SEPSECS  | Pontocerebellar hypoplasia type 2D                                                                                                   | 613811 | AR     |
| RARS1    | Leukodystrophy, hypomyelinating 9                                                                                                    | 616140 | AR     |
| DCAF17   | Woodhouse-Sakati syndrome                                                                                                            | 241080 | AR     |
| RXYLT1   | Muscular dystrophy-dystroglycanopathy (congenital with brain and eye anomalies), type A, 10                                          | 615041 | AR     |
| LIPT2    | Encephalopathy, neonatal severe, with lactic acidosis and brain abnormalities                                                        | 617668 | AR     |
| SIAT9    | Salt and pepper developmental regression syndrome                                                                                    | 609056 | AR     |
| B3GALNT2 | Muscular dystrophy-dystroglycanopathy (congenital with brain and eye anomalies), type A, 11                                          | 615181 | AR     |
| LIPT1    | Lipoyltransferase 1 deficiency                                                                                                       | 616299 | AR     |
| GJB1     | Charcot-Marie-Tooth neuropathy, X-linked dominant, 1                                                                                 | 302800 | XLD    |
| ADAR     | Aicardi-Goutières syndrome type 6                                                                                                    | 615010 | AR     |
| ADGRG1   | Polymicrogyria, bilateral frontoparietal                                                                                             | 606854 | AR     |
| CNTNAP1  | Hypomyelinating neuropathy, congenital, 3                                                                                            | 618186 | AR     |
| MAG      | Spastic paraplegia 75, autosomal recessive                                                                                           | 616680 | AR     |



|           |                                                                                                      |        |     |
|-----------|------------------------------------------------------------------------------------------------------|--------|-----|
| LAMA1     | Poretti-Boltshauser syndrome                                                                         | 615960 | AR  |
| PDP1      | Pyruvate dehydrogenase phosphatase deficiency                                                        | 608782 | AR  |
| TBCK      | Hypotonia, infantile, with psychomotor retardation and characteristic facies 3                       | 616900 | AR  |
| PRUNE1    | Neurodevelopmental disorder with microcephaly, hypotonia, and variable brain anomalies               | 617481 | AR  |
| HEPACAM   | Megalencephalic leukoencephalopathy with subcortical cysts type 2A                                   | 613925 | AR  |
| HEPACAM   | Megalencephalic leukoencephalopathy with subcortical cysts type 2B                                   | 613926 | AD  |
| MPLKIP    | Trichothiodystrophy, nonphotosensitive                                                               | 234050 | AR  |
| SPAST     | Spastic paraplegia 4 (SPG4)                                                                          | 182601 | AD  |
| ZFYVE26   | Spastic paraplegia 15 (SPG15)                                                                        | 270700 | AR  |
| APP       | Cerebral amyloid angiopathy, Dutch, Italian, Iowa, Flemish, Arctic variants                          | 605714 | AD  |
| ITM2B     | Dementia, familial British                                                                           | 176500 | AD  |
| NOTCH3    | Cerebral arteriopathy with subcortical infarcts and leukoencephalopathy (CADASIL)                    | 125310 | AD  |
| HTRA1     | Cerebral autosomal dominant arteriopathy with subcortical infarcts and leukoencephalopathy (CARASIL) | 616779 | AD  |
| HTRA1     | CARASIL syndrome                                                                                     | 600142 | AR  |
| PRF1      | Familial hemophagocytic lymphohistiocytosis 2                                                        | 603553 | AR  |
| RNF216    | Cerebellar ataxia and hypogonadotropic hypogonadism                                                  | 212840 | AR  |
| RNF13     | Epileptic encephalopathy, early infantile, 73                                                        | 618379 | AD  |
| CST3      | Cerebral amyloid angiopathy                                                                          | 105150 | AD  |
| GBE1      | Adult polyglucosan body disease (APBD)                                                               | 263570 | AR  |
| LMNB1     | Adult onset leukodystrophy (ADLD)                                                                    | 169500 | AD  |
| CSF1R     | Hereditary diffuse leukoencephalopathy with spheroids                                                | 221820 | AD  |
| NOTCH2NLC | Neuronal intranuclear inclusion disease                                                              | 603472 | AD  |
| ALDH3A2   | Sjögren-Larsson syndrome                                                                             | 270200 | AR  |
| SOX10     | PCWH syndrome                                                                                        | 609136 | AD  |
| SOX10     | Waardenburg syndrome, type 2E, with or without neurologic involvement                                | 611584 | AD  |
| ADSL      | Adenylosuccinate lyase deficiency                                                                    | 103050 | AR  |
| MOCS1     | Molybdenum cofactor deficiency A                                                                     | 252150 | AR  |
| ASS1      | Citrullinemia type I                                                                                 | 215700 | AR  |
| ASL       | Argininosuccinic aciduria                                                                            | 207900 | AR  |
| ARG1      | Argininemia                                                                                          | 207800 | AR  |
| AIFM1     | Combined oxidative phosphorylation deficiency 6                                                      | 300816 | XLR |
| SLC13A3   | Leukoencephalopathy, acute reversible, with increased urinary alpha-ketoglutarate                    | 618384 | AR  |
| GAN       | Giant axonal neuropathy                                                                              | 256850 | AR  |
| CYP27A1   | Cerebrotendinous xanthomatosis                                                                       | 213700 | AR  |
| FMR1      | Fragile X tremor/ataxia syndrome                                                                     | 300623 | XLD |
| TREM2     | Polycystic lipomembranous osteodysplasia with sclerosing leukoencephalopathy 2                       | 618193 | AD  |
| ATN1      | Dentatorubropallidolusian atrophy                                                                    | 125370 | AD  |
| UFM1      | Leukodystrophy, hypomyelinating, 14                                                                  | 617899 | AR  |
| TMEM106B  | Leukodystrophy, hypomyelinating, 16                                                                  | 617964 | AD  |
| NKX6-2    | Spastic ataxia 8, autosomal recessive, with hypomyelinating leukodystrophy                           | 617560 | AR  |
| HIKESHI   | Leukodystrophy, hypomyelinating, 13                                                                  | 616881 | AR  |
| NFE2L2    | Immunodeficiency, developmental delay, and hypohomocysteinemia                                       | 617744 | AD  |
| FIG4      | Yunis-Varon syndrome                                                                                 | 216340 | AR  |
| PUS3      | Mental retardation, autosomal recessive 55                                                           | 617051 | AR  |
| TUBB4A    | Hypomyelinating leukodystrophy 6                                                                     | 612438 | AD  |
| TUBB4A    | Dystonia, type4                                                                                      | 128101 | AD  |
| CYP7B1    | Spastic paraplegia 5A                                                                                | 270800 | AR  |
| FA2H      | Spastic paraplegia 35                                                                                | 612319 | AR  |
| CYP2U1    | Spastic paraplegia 56                                                                                | CYP2U1 | AR  |
| TYROBP    | Nasu-Hakola disease                                                                                  | 221770 | AR  |
| OCRL      | Lowe syndrome                                                                                        | 309000 | XLR |
| COL3A1    | Polymicrogyria with or without vascular-type EDS                                                     | 618343 | AR  |
| ITPA      | Epileptic encephalopathy, early infantile, 35                                                        | 616647 | AR  |

|           |                                                                                                                            |        |     |
|-----------|----------------------------------------------------------------------------------------------------------------------------|--------|-----|
| COLGALT1  | Brain small vessel disease 3                                                                                               | 618360 | AR  |
| SLC19A3   | Thiamine metabolism dysfunction syndrome 2 (biotin- or thiamine-responsive encephalopathy type 2)                          | 607483 | AR  |
| PDGFRB    | Kosaki overgrowth syndrome                                                                                                 | 616592 | AD  |
| PLEKHG2   | Leukodystrophy and acquired microcephaly with or without dystonia                                                          | 616763 | AR  |
| MGP       | Keutel syndrome                                                                                                            | 245150 | AR  |
| NOTCH1    | Adams-Oliver syndrome 5                                                                                                    | 616028 | AD  |
| CRLF1     | Cold-induced sweating syndrome 1                                                                                           | 272430 | AR  |
| DDC       | Aromatic L-amino acid decarboxylase deficiency                                                                             | 608643 | AR  |
| ACTA2     | Multisystemic smooth muscle dysfunction syndrome                                                                           | 613834 | AD  |
| SLC1A4    | Spastic tetraplegia, thin corpus callosum, and progressive microcephaly                                                    | 616657 | AR  |
| KIDINS220 | Spastic paraplegia, intellectual disability, nystagmus, and obesity                                                        | 617296 | AD  |
| DCC       | Gaze palsy, familial horizontal, with progressive scoliosis, 2                                                             | 617542 | AR  |
| UFC1      | Neurodevelopmental disorder with spasticity and poor growth                                                                | 618076 | AR  |
| EHMT1     | Kleefstra syndrome 1                                                                                                       | 610253 | AD  |
| UBA5      | Epileptic encephalopathy, early infantile, 44                                                                              | 617132 | AR  |
| OTUD6B    | Intellectual developmental disorder with dysmorphic facies, seizures, and distal limb anomalies                            | 617452 | AR  |
| PHACTR1   | Epileptic encephalopathy, early infantile, 70                                                                              | 618298 | AD  |
| MAPK8IP3  | Neurodevelopmental disorder with or without variable brain abnormalities                                                   | 618443 | AD  |
| NGLY1     | Congenital disorder of deglycosylation                                                                                     | 615273 | AR  |
| NHLRC2    | FINCA syndrome                                                                                                             | 618278 | AR  |
| PPP3CA    | Epileptic encephalopathy, infantile or early childhood, 1                                                                  | 617711 | AD  |
| ALG13     | Epileptic encephalopathy, early infantile, 36                                                                              | 300884 | XLD |
| GNAO1     | Epileptic encephalopathy, early infantile, 17                                                                              | 615473 | AD  |
| WWOX      | Epileptic encephalopathy, early infantile, 28                                                                              | 616211 | AR  |
| NTRK2     | Epileptic encephalopathy, early infantile, 3                                                                               | 617830 | AD  |
| RHOBTB2   | Epileptic encephalopathy, early infantile, 64                                                                              | 618004 | AD  |
| COL4A2    | Brain small vessel disease 2                                                                                               | 614483 | AD  |
| SNORD118  | Leukodystrophy with calcifications and cysts                                                                               | 614561 | AR  |
| COL4A1    | Microangiopathy and leukoencephalopathy, pontine                                                                           | 618564 | AD  |
| GLA       | Fabry disease                                                                                                              | 301500 | XL  |
| IFIH1     | Aicardi-Goutières syndrome type 7                                                                                          | 615846 | AD  |
| RNASET2   | RNase T2-deficient leukoencephalopathy                                                                                     | 612951 | AR  |
| C1R       | Periodontal Ehlers Danlos syndrome                                                                                         | 130080 | AD  |
| GFAP      | Alexander disease                                                                                                          | 203450 | AD  |
| FAM126A   | Hypomyelination with congenital cataract                                                                                   | 610532 | AR  |
| BTD       | Biotinidase deficiency                                                                                                     | 253260 | AR  |
| KLHL7     | PERCHING syndrome                                                                                                          | 617055 | AR  |
| SPATA5    | Epilepsy, hearing loss, and mental retardation syndrome                                                                    | 616577 | AR  |
| MMAB      | Methylmalonic aciduria, vitamin B12-responsive, due to defect in synthesis of adenosylcobalamin, cblB complementation type | 607568 | AR  |
| GRIN2B    | Epileptic encephalopathy, early infantile, 27                                                                              | 616139 | AD  |
| HEXB      | Sandhoff disease                                                                                                           | 268800 | AR  |

AD = autosomal dominant inheritance, AR = autosomal recessive inheritance, XL = X linked, XLD = X linked dominant inheritance, XLR = X linked recessive inheritance

**Supplementary Table 2: Clinical and imaging features of hereditary nonvascular leukoencephalopathy in our cohort**

| <b>Clinical characteristics of hereditary nonvascular leukoencephalopathy</b> |                                                                                                         |
|-------------------------------------------------------------------------------|---------------------------------------------------------------------------------------------------------|
| Psychiatric symptoms                                                          | ALD, CblC disease, NIID, AARS2-L, ALSP, VWMD                                                            |
| Cognitive impairment                                                          | ALD, CblC disease, NIID, AARS2-L, ALSP, VWMD                                                            |
| Mental retardation                                                            | PKU, CTX, Pol-III-related disorders, PMLD, VWMD                                                         |
| Severe headache                                                               | NIID, Glutaricaciduria, LKPAT                                                                           |
| Early prominent ataxia                                                        | CTX, Alexander's disease, Pol-III-related disorders, GHS, ALD, LBSL, ALSP, VWMD                         |
| Parkinsonism                                                                  | NIID, ALSP                                                                                              |
| Spastic paraplegia                                                            | HSP, ALD, Krabbe disease, CblC disease, MTHFR deficiency, ADLD                                          |
| Palatal myoclonus                                                             | Alexander's disease                                                                                     |
| Epilepsy                                                                      | LGMDR23, ALD, CblC disease, NIID, mitochondrial disease, VWMD                                           |
| Peripheral neuropathy                                                         | ALD, Krabbe disease, CTX, CMT-X, CblC disease, MTHFR deficiency, NIID, LBSL, Mitochondrial disease, HSP |
| Lower motor neuron syndrome                                                   | Sandhoff disease, Krabbe disease,                                                                       |
| Autonomic symptoms                                                            | ADLD, NIID                                                                                              |
| Myopathy                                                                      | DM1, LGMDR23, Mitochondrial disease, AARS2-L, NIID                                                      |
| Episodic neurological events                                                  | NIID                                                                                                    |
| Rapid deterioration following head trauma                                     | ALD, VWMD                                                                                               |
| Optic nerve atrophy                                                           | ALD, LBSL, AARS2-L, mitochondrial disease, VWMD, DM1                                                    |
| Cataract                                                                      | CTX, DM1                                                                                                |
| Oligodontia                                                                   | Pol-III-related disorders                                                                               |
| Adrenocortical insufficiency                                                  | ALD                                                                                                     |
| Premature ovarian failure                                                     | VWMD, AARS2-L                                                                                           |
| Hypogonadotrophic hypogonadism                                                | GHS, Pol-III-related disorders                                                                          |
| Tendon Xanthoma                                                               | CTX                                                                                                     |
| Abnormal skin colour                                                          | ALD, PKU                                                                                                |
| <b>Imaging characteristics of hereditary nonvascular leukoencephalopathy</b>  |                                                                                                         |
| Anterior temporal lobe involvement                                            | DM, LGMDR23                                                                                             |
| Corpus callosum involvement                                                   | ALSP, VWMD, AARS2-L, HSP (SPG11, SPG15, SPG7), ADLD, NIID                                               |
| Abnormal signal along pyramidal tract                                         | Krabbe disease, Pol-III-related disorders                                                               |
| Spinal cord and brainstem involvement                                         | Alexander's disease, LBSL                                                                               |
| Cerebellar dentate nucleus                                                    | CTX, ALD                                                                                                |
| Cerebellar vermis                                                             | NIID                                                                                                    |
| Middle cerebellar peduncles                                                   | NIID, LKPAT, ALD, LBSL, VWMD                                                                            |
| Cystic degeneration                                                           | VWMD                                                                                                    |
| Punctate calcification                                                        | ALSP, ALD                                                                                               |
| Contrast enhancement                                                          | ALD                                                                                                     |
| Deep white matter diffusion dots                                              | ALSP, AARS2-L, LBSL                                                                                     |
| High signals along the corticomedullary junction on DWI                       | NIID                                                                                                    |
| Transient and reversible white matter lesions                                 | CMT-X                                                                                                   |

AARS2-L = AARS2-related leukodystrophy; ADLD = adult-onset autosomal dominant leukodystrophy; ALD = adrenoleukodystrophy; ALSP = adult-onset leukoencephalopathy with axonal spheroids and pigmented glia; CblC = methylmalonic aciduria and homocystinuria cblC type; CMT-X = X-linked Charcot-Marie-Tooth; CTX = cerebrotendinous xanthomatosis; DM1 = myotonic dystrophy type 1; GHS = Gordon Holmes syndrome; HSP = hereditary spastic paraplegia; LBSL = leukoencephalopathy with brainstem and spinal cord involvement with elevated lactate; LGMDR23 = autosomal recessive limb-girdle muscular dystrophy-23; LKPAT = leukoencephalopathy with ataxia; MTHFR deficiency = methylenetetrahydrofolate reductase deficiency; NIID = neuronal intranuclear inclusion disease; PKU = phenylketonuria; PMLD = Pelizaeus-Merzbacher-like disease; SPG = spastic paraplegia; VWMD = vanishing white matter disease.

**Supplementary Table 3: Novel pathogenic or likely pathogenic variants of *NOTCH3* gene identified in our cohort**

| Clinical features |        |     |                                                                                                    | <i>NOTCH3</i> mutations |                   | Location |            | Population frequency |      |        | Bioinformatics Prediction |            |                 | Skin biopsy <sup>a</sup> | Pathogenicity |
|-------------------|--------|-----|----------------------------------------------------------------------------------------------------|-------------------------|-------------------|----------|------------|----------------------|------|--------|---------------------------|------------|-----------------|--------------------------|---------------|
| Patients          | Gender | AAO | Neurological manifestations                                                                        | Nucleotide change       | Amino acid change | Exon     | EGF repeat | 1000G                | ExAc | gnomAD | SIFT                      | Polyphen-2 | Mutation Taster |                          |               |
| 1                 | M      | 46  | Ischemic stroke, cognitive impairment                                                              | c.202_203insACC         | p. P68delinsHP    | 3        | 1          | 0                    | 0    | 0      | -                         | -          | Polymorphism    | GOM (+)                  | P             |
| 2                 | F      | 67  | Cognitive impairment                                                                               | c.202_203insACC         | p. P68delinsHP    | 3        | 1          | 0                    | 0    | 0      | -                         | -          | Polymorphism    | NA                       | P             |
| 3                 | F      | 49  | Ischemic stroke, cognitive impairment                                                              | c.239A>T                | p. D80V           | 3        | 2          | 0                    | 0    | 0      | D                         | B          | D               | NA                       | LP            |
| 4                 | F      | 34  | Ischemic stroke, haemorrhagic stroke, cognitive impairment, psychiatric symptoms, gait disturbance | c.242C>A                | p. P81H           | 3        | 2          | 0                    | 0    | 0      | D                         | Pro_D      | D               | NA                       | LP            |
| 5                 | M      | 32  | Ischemic stroke                                                                                    | c.454G>T                | p. G152C          | 4        | 3          | 0                    | 0    | 0      | D                         | Pro_D      | D               | GOM (+)                  | P             |
| 6                 | M      | 32  | Ischemic stroke, cognitive impairment, psychiatric symptoms                                        | c.535G>T                | p. G179C          | 4        | 4          | 0                    | 0    | 0      | D                         | Pro_D      | D               | GOM (+)                  | P             |
| 7                 | M      | 35  | Transient numbness of limbs                                                                        | c.1369T>C               | p. C457R          | 8        | 11         | 0                    | 0    | 0      | D                         | Pro_D      | D               | NA                       | LP            |
| 8                 | F      | 43  | Hemianesthesia                                                                                     | c.1597T>G               | p. C533G          | 10       | 13         | 0                    | 0    | 0      | D                         | Pro_D      | D               | NA                       | LP            |
| 9                 | M      | 28  | Migraine, TIA                                                                                      | c.1969G>T               | p. E657*          | 13       | 17         | 0                    | 0    | 0      | -                         | -          | D               | NA                       | LP            |
| 10                | M      | 43  | haemorrhagic stroke, cognitive impairment, psychiatric symptoms                                    | c.2041_2042insC GCT     | p. C681Sfs*23     | 13       | 17         | 0                    | 0    | 0      | -                         | -          | D               | GOM (+)                  | P             |

AAO = age at onset; F = female; M = male; TIA = transient ischemic attacks; EGF = epidermal growth factor; 1000G = 1000 Genomes Project database; ExAc = Exome Aggregation Consortium database; gnomAD = the Genome Aggregation Database; SIFT = Sorting Tolerant From Intolerant; Polyphen-2 = Polymorphism Phenotyping v2; B = benign; D = damaging, deleterious, or disease-causing; Pro\_D = probably damaging; P = pathogenic; LP = likely pathogenic; NA = not available.

<sup>a</sup>GOM (+): positive GOM (granular osmiophilic material) deposit in skin biopsies

**Supplementary Table 4: Mutations identified in CADASIL patients in our cohort**

| Exon    | Nucleotide change  | Amino acid change | EGF repeat domain | Number of pedigrees |
|---------|--------------------|-------------------|-------------------|---------------------|
| Exon 2  | c.160C>T           | p. R54C           | 1                 | 1                   |
| Exon 3  | c.202_203insACC    | p. P68delinsHP    | 1                 | 2                   |
|         | c.224G>A           | p. R75Q           | 1                 | 1                   |
|         | c.239A>T           | p. D80V           | 2                 | 1                   |
|         | c.242C>A           | p. P81H           | 2                 | 1                   |
|         | c.268C>T           | p. R90C           | 2                 | 1                   |
|         | c.328C>T           | p. R110C          | 2                 | 2                   |
| Exon 4  | c.391G>T           | p. G131C          | 3                 | 1                   |
|         | c.397C>T           | p. R133C          | 3                 | 1                   |
|         | c.421C>T           | p. R141C          | 3                 | 2                   |
|         | c.437G>A           | p. C146Y          | 3                 | 1                   |
|         | c.454G>T           | p. G152C          | 3                 | 1                   |
|         | c.457C>T           | p. R153C          | 3                 | 3                   |
|         | c.505C>T           | p. R169C          | 4                 | 4                   |
|         | c.535G>T           | p. G179C          | 4                 | 1                   |
|         | c.544C>T           | p. R182C          | 4                 | 1                   |
|         | c.566A>G           | p. Y189C          | 4                 | 1                   |
|         | c.602G>A           | p. C201Y          | 5                 | 1                   |
|         | c.636C>G           | p. C212W          | 5                 | 1                   |
|         | c.665G>A           | p. C222Y          | 5                 | 1                   |
| Exon 5  | c.719G>C           | p. C240S          | 6                 | 3                   |
|         | c.752G>A           | p. C251Y          | 6                 | 1                   |
| Exon 6  | c.994C>T           | p. R332C          | 8                 | 1                   |
| Exon 8  | c.1258G>T          | p. G420C          | 10                | 1                   |
|         | c.1279C>T          | p. R427C          | 10                | 2                   |
|         | c.1369T>C          | p. C457R          | 11                | 1                   |
| Exon 10 | c.1597T>G          | p. C533G          | 13                | 1                   |
| Exon 11 | c.1630C>T          | p. R544C          | 13-14             | 4                   |
|         | c.1672C>T          | p. R558C          | 14                | 2                   |
|         | c.1759C>T          | p. R587C          | 15                | 1                   |
|         | c.1819C>T          | p. R607C          | 15                | 2                   |
| Exon 13 | c.1969G>T          | p. E657*          | 17                | 1                   |
|         | c.2041_2042insCGCT | p. C681Sfs*23     | 17                | 1                   |
| Exon 19 | c.3091C>T          | p. R1031C         | 26                | 1                   |

CADASIL = cerebral autosomal dominant arteriopathy with subcortical infarcts and leukoencephalopathy; EGF: epidermal growth factor

**Supplementary Table 5: Heterozygous *HTRAI* mutations identified in our cohort**

| Clinical features |        |     |                                                                               |                       |          | <i>HTRAI</i> mutations |            | Location |                 | Population frequency |          |          | Bioinformatics Prediction |            |                 | HGMD  | Pathogenicity |
|-------------------|--------|-----|-------------------------------------------------------------------------------|-----------------------|----------|------------------------|------------|----------|-----------------|----------------------|----------|----------|---------------------------|------------|-----------------|-------|---------------|
| Family            | Gender | AAO | Neurological manifestations                                                   | Spondylosis deformans | Alopecia | Nucleotide             | Amino acid | Exon     | Domain          | 1000G                | ExAc     | gnomAD   | SIFT                      | Polyphen-2 | Mutation Taster |       |               |
| 1                 | M      | 42  | Ischemic stroke, cognitive impairment, psychiatric symptoms, gait disturbance | NA                    | -        | c.523G>A               | p. V175M   | 2        | ...             | 0                    | 0.000008 | 0.000004 | D                         | Pro_D      | D               | Known | P             |
| 2                 | M      | 42  | Ischemic stroke, cognitive impairment, psychiatric symptoms                   | NA                    | -        | c.832T>C               | p. F278L   | 4        | Serine protease | 0                    | 0.000008 | 0.000004 | D                         | Pro_D      | D               | Novel | LP            |
| 3                 | F      | 44  | Ischemic stroke, cognitive impairment, psychiatric symptoms, gait disturbance | NA                    | -        | c.834C>G               | p. F278L   | 4        | Serine protease | 0                    | 0        | 0        | D                         | Pro_D      | D               | Novel | LP            |
| 4                 | F      | 40  | Ischemic stroke, cognitive impairment, psychiatric symptoms, gait disturbance | NA                    | -        | c.854C>T               | p. P285L   | 4        | Serine protease | 0                    | 0        | 0.000004 | D                         | Pro_D      | D               | Known | P             |
| 5                 | F      | 44  | Cognitive impairment, psychiatric symptoms, gait disturbance                  | NA                    | -        | c.905G>A               | p. R302Q   | 4        | Serine protease | 0                    | 0        | 0        | D                         | Pro_D      | D               | Known | P             |
| 6                 | M      | 38  | Ischemic stroke, cognitive impairment                                         | +                     | -        | c.954G>C               | p. Q318H   | 4        | Serine protease | 0                    | 0        | 0.000004 | D                         | Pro_D      | D               | Novel | LP            |
| 6                 | M      | 41  | Ischemic stroke, cognitive impairment, psychiatric symptoms                   | +                     | -        | c.954G>C               | p. Q318H   | 4        | Serine protease | 0                    | 0        | 0.000004 | D                         | Pro_D      | D               | Novel | LP            |
| 6                 | M      | 38  | Cognitive impairment, gait disturbance                                        | NA                    | -        | c.954G>C               | p. Q318H   | 4        | Serine protease | 0                    | 0        | 0.000004 | D                         | Pro_D      | D               | Novel | LP            |
| 7                 | M      | 45  | Ischemic stroke, cognitive impairment, psychiatric symptoms, gait disturbance | NA                    | -        | c.983C>T               | p. S328L   | 5        | Serine protease | 0                    | 0        | 0        | D                         | Pro_D      | D               | Novel | LP            |
| 8                 | F      | 42  | Cognitive impairment, psychiatric symptoms, gait disturbance                  | NA                    | -        | c.1015G>A              | p. V339M   | 6        | Serine protease | 0                    | 0        | 0        | D                         | Pro_D      | D               | Novel | LP            |
| 9                 | M      | 37  | Cognitive impairment, psychiatric symptoms, gait disturbance                  | +                     | +        | c.1049G>A              | p. G350E   | 6        | Serine protease | 0                    | 0        | 0        | D                         | Pro_D      | D               | Novel | LP            |

AAO = age at onset; F = female; M = male; 1000G = 1000 Genomes Project database; ExAC = Exome Aggregation Consortium database; gnomAD = the Genome Aggregation Database; SIFT = Sorting Tolerant From Intolerant; Polyphen-2 = Polymorphism Phenotyping v2; HGMD = Human Gene Mutation Database; D = damaging, deleterious, or disease-causing; Pro\_D = probably damaging; P = pathogenic; LP = likely pathogenic; + = present; - = absent; NA = not available.

**Supplementary Table 6: Heterozygous *COL4A1/2* mutations identified in our cohort**

| Clinical features |        |     |                                                                                     |                                                                | <i>COL4A1/2</i> mutations |            |            | Location | Population frequency |            |            | Bioinformatics Prediction |            |                 | Biopsy <sup>a</sup> | Phenotype | HGMD  | Pathogenicity |
|-------------------|--------|-----|-------------------------------------------------------------------------------------|----------------------------------------------------------------|---------------------------|------------|------------|----------|----------------------|------------|------------|---------------------------|------------|-----------------|---------------------|-----------|-------|---------------|
| Patients          | Gender | AAO | Neurological manifestations                                                         | Systematic symptoms                                            | Gene                      | Nucleotide | Amino acid | Exon     | 1000G                | ExAc       | gnomAD     | SIFT                      | Polyphen-2 | Mutation Taster |                     |           |       |               |
| 1                 | F      | 39  | Recurrent brainstem infarction                                                      | Patent foramen ovale, paroxysmal atrial tachycardia            | <i>COL4A1</i>             | c.*34G>T   | -          | 3'UTR    | 0                    | 0          | 0          | -                         | -          | -               | +                   | PADMAL    | Novel | LP            |
| 2                 | F      | 48  | Muscle cramps, psychiatric disorder                                                 | Chronic glomerulonephritis, renal cyst, coronary heart disease | <i>COL4A1</i>             | c.1A>G     | p.M1?      | 1        | 0                    | 0          | 0          | -                         | -          | -               | +                   | HANAC     | Novel | P             |
| 3                 | F      | 38  | Intracranial haemorrhage, cognitive impairment, psychiatric disorder, muscle cramps | Cataract, intracranial aneurysm                                | <i>COL4A1</i>             | c.1961C>A  | p. P654Q   | 27       | 0                    | 0.0000174  | 0.00001314 | T                         | B          | D               | +                   | HANAC     | Novel | LP            |
| 4                 | F      | 36  | Cognitive impairment                                                                | Cataract                                                       | <i>COL4A1</i>             | c.2008G>A  | p. G670R   | 28       | 0                    | 0          | 0          | D                         | Pro_D      | D               | NA                  | BSVD1     | Known | P             |
| 5                 | M      | 48  | Cognitive impairment, gait disturbance                                              | Retinal arteriolar tortuosity, proteinuria                     | <i>COL4A2</i>             | c.1735C>T  | p. R579C   | 24       | 0                    | 0.00001673 | 0.00000813 | D                         | Pos_D      | polymorphism    | +                   | BSVD2     | Novel | LP            |
| 6                 | F      | 66  | Intracranial haemorrhage                                                            | Retinal arteriolar tortuosity, retinal detachment              | <i>COL4A2</i>             | c.4514C>T  | p. P1505L  | 46       | 0                    | 0.00003623 | 0.0000452  | D                         | Pro_D      | D               | +                   | BSVD2     | Novel | LP            |

AAO = age at onset; F = female; M = male; 1000G = 1000 Genomes Project database; ExAC = Exome Aggregation Consortium database; gnomAD = the Genome Aggregation Database; SIFT = Sorting Tolerant From Intolerant; Polyphen-2 = Polymorphism Phenotyping v2; HGMD = Human Gene Mutation Database; B = benign; D = damaging, deleterious, or disease-causing; Pro\_D = probably damaging; Pos\_D = possibly damaging; T = tolerated; P = pathogenic; LP = likely pathogenic; NA = not available; PADMAL = pontine autosomal dominant microangiopathy and leukoencephalopathy; HANAC = hereditary angiopathy with nephropathy, aneurysm, and muscle cramps; BSVD1 = brain small vessel disease 1 with or without ocular anomalies; BSVD2 = brain small vessel disease 2.

<sup>a</sup> Biopsy: + means that skin biopsy revealed thickening of vascular basement membrane in the dermal layer of the skin, proliferation of vascular endothelial cells, and stenosis of vascular lumen.

**Supplementary Table 7: Clinical and genetic features of patients of myelin disorders identified in our cohort**

| Patients | Gene           | Nucleotide changes  | AA changes   | Geno type | Gender | AAO     | Initial symptoms                     | Other neurological symptoms                                                                       | Extraneurological symptoms              | Biochemical results                                                                                    | HGMD  | Pathogenicity |
|----------|----------------|---------------------|--------------|-----------|--------|---------|--------------------------------------|---------------------------------------------------------------------------------------------------|-----------------------------------------|--------------------------------------------------------------------------------------------------------|-------|---------------|
| 1        | <i>GJC2</i>    | c.167G>C            | p.C56S       | Het       | F      | Infancy | Psychomotor retardation              | Nystagmus, spasticity, ataxia, dysarthria                                                         | No                                      | -                                                                                                      | Novel | LP            |
|          |                | c.704A>G            | p.Y235C      | Het       |        |         |                                      |                                                                                                   |                                         |                                                                                                        | Novel | LP            |
| 2        | <i>GALC</i>    | c.1901T>C           | p.L634S      | Het       | M      | 30      | Spastic paraplegia                   | Sphincter dysfunction                                                                             | No                                      | GALC enzyme activity of leukocytes: 1.0nmol/17h/mgpr (normal range 19-68.2nmol/17h/mgpr)               | Known | P             |
|          |                | c.658C>T            | p.R220*      | Het       |        |         |                                      |                                                                                                   |                                         |                                                                                                        | Known | P             |
| 3        | <i>GALC</i>    | c.655delC           | p.Q219Sfs*3  | Het       | F      | 16      | Spastic paraplegia                   | No                                                                                                | No                                      | NA                                                                                                     | Novel | P             |
|          |                | c.1901T>C           | p.L634S      | Het       |        |         |                                      |                                                                                                   |                                         |                                                                                                        | Known | P             |
| 4        | <i>GALC</i>    | c.1861C>T           | p.R621C      | Het       | M      | 45      | Spastic hemiplegia                   | Hemiparesthesia, ataxia                                                                           | No                                      | GALC enzyme activity of leukocytes: 2.6nmol/17h/mgpr (normal range 19-68.2nmol/17h/mgpr)               | Novel | LP            |
|          |                | c.175G>A            | p.G59S       | Het       |        |         |                                      |                                                                                                   |                                         |                                                                                                        | Novel | P             |
| 5        | <i>GALC</i>    | c.136G>T            | p.D46Y       | Hom       | F      | 38      | Left upper limb wasting and weakness | Pyramidal signs                                                                                   | No                                      | NA                                                                                                     | Known | P             |
| 6        | <i>CYP27A1</i> | c.379C>T            | p.R127W      | Het       | M      | Infancy | Ataxia                               | Mental retardation, dysarthria, spastic paraplegia, peripheral neuropathy, sensorineural deafness | Cataract, arrhythmia, chronic diarrhoea | NA                                                                                                     | Known | P             |
|          |                | c.380G>A            | p.R127Q      | Het       |        |         |                                      |                                                                                                   |                                         |                                                                                                        | Known | P             |
| 7        | <i>CYP27A1</i> | c.369_375delGTACCCA | p.P125Gfs*16 | Het       | F      | 7       | Ataxia                               | Mental retardation, dysarthria, nystagmus, spastic paraplegia, peripheral neuropathy              | Cataract, arrhythmia, tendon xanthomata | Biopsy of tendon xanthomata revealed rod-shaped cholesterol crystals                                   | Novel | P             |
|          |                | c.73delG            | p.A25Pfs*33  | Het       |        |         |                                      |                                                                                                   |                                         |                                                                                                        | Novel | P             |
| 8        | <i>GJB1</i>    | c.103G>A            | p.V35M       | Hem       | M      | 11      | Peripheral neuropathy                | Dysarthria                                                                                        | No                                      | -                                                                                                      | Known | P             |
| 9        | <i>GJB1</i>    | c.423delC           | p.R142Gfs*54 | Hem       | M      | 15      | Peripheral neuropathy                | Pes cavus                                                                                         | Sensorineural hearing loss              | -                                                                                                      | Novel | P             |
| 10       | <i>GJB1</i>    | c.547C>T            | p.R183C      | Hem       | M      | 44      | Peripheral neuropathy                | Pes cavus, pyramidal signs                                                                        | No                                      | -                                                                                                      | Known | P             |
| 11       | <i>PAH</i>     | c.1316-2A>C         | -            | Het       | M      | Infancy | Mental retardation                   | Psychiatric symptoms, febrile convulsion, pyramidal signs                                         | Musty odor, light pigmentation of skin  | Serum phenylalanine level: 1025.29umol/L(20-120)                                                       | Known | P             |
|          |                | c.1208C>A           | p.A403D      | Het       |        |         |                                      |                                                                                                   |                                         |                                                                                                        | Novel | P             |
| 12       | <i>PAH</i>     | c.278A>T            | p.N93I       | Het       | M      | Infancy | Mental retardation                   | Pyramidal sign                                                                                    | Musty odor, light pigmentation of skin  | Serum phenylalanine level: 955.21umol/L (20-120)                                                       | Novel | P             |
|          |                | c.422-1G>A          | -            | Het       |        |         |                                      |                                                                                                   |                                         |                                                                                                        | Known | P             |
| 13       | <i>PAH</i>     | c.442-1G>A          | -            | Hom       | M      | Infancy | Mental retardation                   | Febrile convulsion, spastic hemiplegia                                                            | Musty odor, light pigmentation of skin  | Serum phenylalanine level: 1152.54umol/L (20-120)                                                      | Known | P             |
| 14       | <i>PAH</i>     | c.728G>A            | p.R243Q      | Hom       | M      | Infancy | Mental retardation                   | No                                                                                                | Musty odor, light pigmentation of skin  | Serum phenylalanine level: 463.98umol/L (20-120)                                                       | Known | P             |
| 15       | <i>MMACHC</i>  | c.482G>A            | p.R161Q      | Het       | M      | 13      | Epilepsy                             | Cognitive impairment, psychiatric symptoms, spastic paraplegia, peripheral neuropathy             | No                                      | Urinary methylmalonic acid level: 309.69umol/L (0.2-3.6); Serum homocysteine level: 164.7umol/L (5-15) | Known | P             |
|          |                | c.609G>A            | p.W203*      | Het       |        |         |                                      |                                                                                                   |                                         |                                                                                                        | Known | P             |
| 16       | <i>MMACHC</i>  | c.566G>A            | p.R189H      | Het       | F      | 18      | Cognitive impairment                 | Spastic paraplegia, ataxia, peripheral neuropathy                                                 | Anaemia                                 | Urinary methylmalonic acid level: 34.2umol/L (0.2-3.6); Serum homocysteine level: 210.69umol/L (5-15)  | Known | P             |
|          |                | c.609G>A            | p.W203*      | Het       |        |         |                                      |                                                                                                   |                                         |                                                                                                        | Known | P             |



|    |               |                          |         |     |   |    |                       |                                                          |    |                                                                                                        |       |    |
|----|---------------|--------------------------|---------|-----|---|----|-----------------------|----------------------------------------------------------|----|--------------------------------------------------------------------------------------------------------|-------|----|
| 17 | <i>MMACHC</i> | c.609G>A                 | p.W203* | Het | M | 25 | Cognitive impairment  | psychological disorders, peripheral neuropathy           | No | Serum homocysteine level: 76.6umol/L (5-15)                                                            | Known | P  |
|    |               | c.239A>G                 | p.D80G  | Het |   |    |                       |                                                          |    |                                                                                                        | Novel | LP |
| 18 | <i>MMACHC</i> | c.445_446insA            | p.C149* | Het | M | 35 | Peripheral neuropathy | Spastic paraplegia                                       | No | Urinary methylmalonic acid level: 271.65µmol/L(0.2-3.6); Serum homocysteine level: 144.87umol/L (5-15) | Known | P  |
|    |               | c.482G>A                 | p.R161Q | Het |   |    |                       |                                                          |    |                                                                                                        | Known | P  |
| 19 | <i>MTHFR</i>  | c.994G>T                 | p.V332L | Het | M | 12 | Spastic paraplegia    | Peripheral neuropathy                                    | No | Serum homocysteine level: 101.0umol/L (5-15)                                                           | Novel | LP |
|    |               | c.389G>A                 | p.C130Y | Het |   |    |                       |                                                          |    |                                                                                                        | Novel | LP |
| 20 | <i>MTHFR</i>  | c.1916C>T                | p.T639I | Het | M | 18 | Spastic paraplegia    | Cognitive impairment                                     | No | Serum homocysteine level: 200.9umol/L (5-15)                                                           | Novel | LP |
|    |               | c.584C>T                 | p.A195V | Het |   |    |                       |                                                          |    |                                                                                                        | Known | P  |
| 21 | <i>GCDH</i>   | c.383G>A                 | p.R128Q | Hom | M | 21 | Severe headache       | Cognitive impairment                                     | No | NA                                                                                                     | Known | P  |
| 22 | <i>LMNBI</i>  | <i>LMNBI</i> duplication | -       | Het | M | 59 | Spastic paraparesis   | Parkinsonism, dysarthria, chronic constipation, insomnia | No | -                                                                                                      |       |    |

AA changes = amino acid changes; AAO = age of onset; F = female; M = male; HGMD = Human Gene Mutation Database; LP = likely pathogenic; P = pathogenic; NA = not available.

**Supplementary Table 8: Clinical and genetic features of ALD patients identified in our cohort**

| Patients | Nucleotide changes         | AA changes        | Gender | AAO | Initial symptoms     | Other neurological symptoms                                                                                         | Adrenocortical insufficiency | Increased VLCFA in plasma | Phenotype               | HGMD  | Pathogenicity |
|----------|----------------------------|-------------------|--------|-----|----------------------|---------------------------------------------------------------------------------------------------------------------|------------------------------|---------------------------|-------------------------|-------|---------------|
| 1        | c.24delG                   | p.W10Gfs*6        | M      | 15  | Cognitive impairment | Epilepsy, psychiatric symptoms, ataxia                                                                              | +                            | NA                        | AdolCALD                | Novel | P             |
| 2        | c.290_299delA<br>CTCGGCCGC | p.H97Pfs*3        | M      | 40  | Cognitive impairment | Psychiatric symptoms, pyramidal signs, sphincter dysfunction                                                        | +                            | +                         | ACALD                   | Novel | P             |
| 3        | c.422C>T                   | p.A141V           | M      | 43  | Psychiatric symptoms | Cognitive impairment, ataxia, pyramidal signs, sphincter dysfunction                                                | -                            | +                         | ACALD                   | Known | P             |
| 4        | c.423_431dupC<br>CTCCCTGC  | p.A144_T145insLPA | M      | 34  | Psychiatric symptoms | Cognitive impairment, epilepsy, ataxia, pyramidal signs, sphincter dysfunction, deterioration after head trauma     | -                            | +                         | ACALD                   | Novel | P             |
| 5        | c.848A>G                   | p.H283R           | M      | 30  | Cognitive impairment | Ataxia, pyramidal signs, peripheral neuropathy                                                                      | +                            | NA                        | ACALD                   | Known | P             |
| 6        | c.1209_1214del<br>GTCGTC   | p.403_405del      | M      | 12  | Epilepsy             | Cognitive impairment, psychiatric symptoms, pyramidal signs, peripheral neuropathy, deterioration after head trauma | -                            | NA                        | AdolCALD                | Novel | P             |
| 7        | c.1488+1G>A                | -                 | M      | 38  | Spastic paraplegia   | Cognitive impairment, psychiatric symptoms, peripheral neuropathy, sphincter dysfunction                            | +                            | +                         | ACALD                   | Known | P             |
| 8        | c.1804A>T                  | p.K602*           | M      | 42  | Psychiatric symptoms | Cognitive impairment, deterioration after brain biopsy                                                              | -                            | NA                        | ACALD                   | Known | P             |
| 9        | c.1876G>A                  | p.A626T           | M      | 9   | Epilepsy             | Cognitive impairment, psychiatric symptoms, pyramidal signs, ataxia                                                 | -                            | NA                        | CCALD                   | Known | P             |
| 10       | c.253dupC                  | p.R85Pfs*110      | M      | 28  | Spastic paraplegia   | -                                                                                                                   | -                            | NA                        | AMN                     | Known | P             |
| 11       | c.346G>C                   | p.G116R           | M      | 27  | Spastic paraplegia   | Peripheral neuropathy, deep sensory disturbance, sphincter dysfunction                                              | -                            | NA                        | AMN                     | Known | P             |
| 12       | c.371G>C                   | p.R124P           | M      | 51  | Spastic paraplegia   | Peripheral neuropathy, sphincter dysfunction                                                                        | +                            | +                         | AMN                     | Novel | LP            |
| 13       | c.1028G>A                  | p.G343D           | M      | 25  | Spastic paraplegia   | Sphincter dysfunction, impotence                                                                                    | +                            | NA                        | AMN                     | Known | P             |
| 14       | c.1202G>A                  | p.R401Q           | M      | 25  | Spastic paraplegia   | Memory decline, peripheral neuropathy, sphincter dysfunction                                                        | -                            | NA                        | AMN                     | Known | P             |
| 15       | c.1214_1216del<br>CGT      | p.S405del         | M      | 23  | Ataxia               | Spastic paraplegia, memory decline, sphincter dysfunction                                                           | -                            | NA                        | AMN                     | Novel | P             |
| 16       | c.1552C>T                  | p.R518W           | M      | 25  | Ataxia               | Spastic paraplegia, sphincter dysfunction                                                                           | -                            | NA                        | AMN                     | Known | P             |
| 17       | c.1978C>T                  | p.R660W           | M      | 25  | Spastic paraplegia   | Deep sensory disturbance,                                                                                           | +                            | +                         | AMN                     | Known | P             |
| 18       | c.1252C>T                  | p.R418W           | M      | 30  | Dysarthria           | Dysphagia, ataxia, pyramidal signs                                                                                  | -                            | NA                        | Spinocerebellar variant | Known | P             |
| 19       | c.1390C>T                  | p.R464*           | M      | 22  | Ataxia               | Dysarthria, pyramidal signs, peripheral neuropathy                                                                  | -                            | +                         | Spinocerebellar variant | Known | P             |

AA changes = amino acid changes; AAO = age of onset; M = male; HGMD = Human Gene Mutation Database; VLCFA = very long-chain fatty acids; ALD = adrenoleukodystrophy; AdolALD = adolescent cerebral ALD; ACALD = adult cerebral ALD; CCALD = childhood cerebral ALD; AMN = adrenomyeloneuropathy; P = pathogenic; LP = likely pathogenic; - = absent; + = present; NA = not available.

**Supplementary Table 9: Clinical and genetic features of NIID patients identified in our cohort**

| Patients | Numbers of GGC Repeat | Gender | AAO | Initial symptoms      | Episodic neurogenic events | Cognitive impairment | Autonomic dysfunction | Unconsciousness | Encephalitic episode | Stroke-like episode | Parkinsonism | Tremor | Ataxia | Headache | Seizure | Muscle weakness | Sensory disturbance | Visual loss | Psychiatric disorder |
|----------|-----------------------|--------|-----|-----------------------|----------------------------|----------------------|-----------------------|-----------------|----------------------|---------------------|--------------|--------|--------|----------|---------|-----------------|---------------------|-------------|----------------------|
| 1        | 113                   | F      | 50  | Autonomic dysfunction | +                          | +                    | +                     | -               | -                    | -                   | -            | +      | +      | -        | -       | -               | -                   | -           | -                    |
| 2        | 104                   | F      | 42  | Headache              | +                          | +                    | -                     | -               | -                    | -                   | -            | +      | -      | +        | -       | -               | -                   | -           | -                    |
| 3        | 88                    | M      | 47  | Autonomic dysfunction | +                          | +                    | +                     | -               | +                    | -                   | -            | -      | +      | +        | -       | -               | -                   | -           | +                    |
| 4        | 131                   | F      | 62  | Tremor                | +                          | +                    | -                     | -               | -                    | +                   | -            | +      | -      | -        | -       | -               | -                   | -           | -                    |
| 5        | 159                   | F      | 53  | Cognitive impairment  | -                          | +                    | -                     | -               | -                    | +                   | -            | -      | -      | -        | -       | -               | +                   | -           | +                    |
| 6        | 127                   | M      | 50  | Unconsciousness       | +                          | +                    | +                     | +               | +                    | -                   | -            | -      | -      | -        | +       | +               | -                   | -           | +                    |
| 7        | 107                   | F      | 62  | Encephalitic episode  | +                          | -                    | +                     | -               | +                    | -                   | -            | -      | -      | +        | -       | -               | -                   | +           | -                    |
| 8        | 138                   | F      | 58  | Headache              | -                          | +                    | -                     | -               | -                    | -                   | -            | -      | -      | +        | -       | -               | -                   | -           | -                    |
| 9        | 109                   | F      | 49  | Seizure               | +                          | +                    | +                     | +               | -                    | -                   | -            | -      | -      | -        | +       | -               | -                   | -           | +                    |
| 10       | 125                   | F      | 59  | Tremor                | +                          | -                    | +                     | -               | -                    | -                   | -            | +      | -      | +        | -       | -               | -                   | +           | -                    |
| 11       | 104                   | F      | 66  | Cognitive impairment  | +                          | +                    | -                     | -               | -                    | -                   | -            | -      | -      | -        | -       | -               | -                   | -           | -                    |
| 12       | 120                   | M      | 58  | Autonomic dysfunction | -                          | +                    | +                     | -               | -                    | -                   | -            | -      | -      | -        | -       | -               | -                   | -           | +                    |
| 13       | 123                   | F      | 54  | Tremor                | +                          | +                    | +                     | -               | -                    | +                   | -            | +      | -      | +        | -       | -               | +                   | +           | -                    |
| 14       | 94                    | M      | 69  | Unconsciousness       | +                          | +                    | -                     | +               | -                    | -                   | -            | -      | -      | -        | -       | -               | -                   | -           | +                    |
| 15       | 139                   | M      | 65  | Parkinsonism          | -                          | +                    | +                     | -               | -                    | -                   | +            | -      | -      | -        | -       | -               | -                   | -           | -                    |
| 16       | 87                    | M      | 64  | Cognitive impairment  | +                          | +                    | +                     | -               | -                    | -                   | -            | +      | -      | +        | -       | -               | -                   | -           | -                    |
| 17       | 122                   | F      | 54  | Cognitive impairment  | +                          | +                    | +                     | -               | -                    | -                   | +            | +      | -      | -        | -       | -               | -                   | +           | -                    |
| 18       | 109                   | F      | 62  | Involuntary movement  | -                          | +                    | +                     | -               | -                    | -                   | -            | -      | -      | -        | -       | -               | -                   | -           | +                    |
| 19       | 121                   | F      | 55  | Autonomic dysfunction | +                          | +                    | +                     | -               | -                    | -                   | -            | +      | -      | -        | -       | -               | -                   | -           | +                    |
| 20       | 141                   | F      | 57  | Cognitive impairment  | -                          | +                    | -                     | -               | -                    | -                   | -            | -      | -      | +        | -       | -               | -                   | +           | -                    |
| 21       | 120                   | F      | 59  | Cognitive impairment  | -                          | +                    | +                     | -               | -                    | -                   | -            | +      | +      | +        | -       | -               | -                   | -           | +                    |
| 22       | 139                   | M      | 51  | Visual loss           | +                          | +                    | +                     | -               | -                    | -                   | -            | -      | +      | -        | +       | -               | -                   | +           | +                    |
| 23       | 128                   | F      | 18  | Headache              | +                          | +                    | -                     | -               | -                    | -                   | -            | +      | +      | +        | -       | -               | -                   | -           | +                    |
| 24       | 93                    | F      | 48  | Autonomic dysfunction | +                          | +                    | +                     | +               | -                    | -                   | -            | -      | +      | -        | -       | +               | -                   | -           | +                    |
| 25       | 150                   | F      | 35  | Tremor                | -                          | +                    | +                     | -               | -                    | -                   | +            | +      | +      | -        | -       | -               | -                   | -           | +                    |
| 26       | 89                    | F      | 54  | Headache              | +                          | +                    | +                     | +               | -                    | -                   | -            | +      | +      | +        | -       | -               | -                   | +           | -                    |
| 27       | 153                   | M      | 61  | Dizziness             | +                          | +                    | +                     | -               | -                    | -                   | +            | +      | -      | -        | -       | +               | +                   | -           | +                    |
| 28       | 111                   | M      | 60  | Psychiatric           | +                          | +                    | +                     | -               | -                    | -                   | -            | +      | -      | +        | -       | -               | -                   | +           | +                    |

|    |     |   |    |                       |   |   |   |   |   |   |   |   |   |   |   |   |   |   |   |
|----|-----|---|----|-----------------------|---|---|---|---|---|---|---|---|---|---|---|---|---|---|---|
|    |     |   |    | symptoms              |   |   |   |   |   |   |   |   |   |   |   |   |   |   |   |
| 29 | 115 | M | 56 | Cognitive impairment  | - | + | + | - | - | - | - | - | + | - | - | - | - | - | + |
| 30 | 101 | F | 62 | Cognitive impairment  | + | + | + | + | - | - | - | - | + | + | - | - | + | - | - |
| 31 | 105 | F | 58 | Autonomic dysfunction | - | + | + | - | - | - | - | + | + | - | - | - | - | - | - |
| 32 | 123 | F | 59 | Cognitive impairment  | + | + | + | - | - | - | - | - | - | + | - | - | - | - | + |
| 33 | 107 | M | 61 | Cognitive impairment  | + | + | + | + | - | - | + | - | - | + | - | - | - | + | + |
| 34 | 105 | M | 67 | Cognitive impairment  | - | + | + | - | - | - | - | + | - | + | - | + | + | - | - |
| 35 | 114 | F | 48 | Dizziness             | + | + | + | - | - | - | - | + | - | - | - | + | + | - | + |
| 36 | 135 | F | 50 | Tremor                | - | + | + | - | - | - | - | + | - | + | - | - | + | + | - |
| 37 | 93  | M | 51 | Tremor                | + | + | + | - | - | + | - | + | + | - | - | - | - | - | - |
| 38 | 128 | M | 48 | Tremor                | - | + | + | - | - | - | - | + | - | - | - | - | - | + | - |
| 39 | 134 | F | 59 | Sensory disturbance   | - | - | + | - | - | - | - | + | - | + | - | - | + | - | - |

NIID = neuronal intranuclear inclusion disease; AAO = age of onset; F = female; M = male; - = absent; + = present.

**Supplementary Table 10: Clinical and genetic features of patients of other leuko-axonopathies identified in our cohort**

| Patients | Gene           | Nucleotide changes          | AA changes    | Genotype | Gender | AAO     | Initial symptoms          | Other neurological symptoms                                                                                          | Extraneurological symptoms                            | HGMD  | Pathogenicity |
|----------|----------------|-----------------------------|---------------|----------|--------|---------|---------------------------|----------------------------------------------------------------------------------------------------------------------|-------------------------------------------------------|-------|---------------|
| 1        | <i>AARS2</i>   | c.452T>C                    | p.M151T       | Hom      | M      | 37      | Cognitive impairment      | Fatigability                                                                                                         | No                                                    | Known | P             |
| 2        | <i>AARS2</i>   | c.452T>C                    | p.M151T       | Het      | M      | 28      | Spastic hemiplegia        | Cognitive impairment, psychiatric symptoms, nystagmus, dysarthria, tremor                                            | Arrhythmia                                            | Known | P             |
|          |                | c.1871G>A                   | p.W624*       | Het      |        |         |                           |                                                                                                                      |                                                       | Known | P             |
| 3        | <i>AARS2</i>   | c.637G>C                    | p.G213R       | Het      | F      | 40      | Cognitive impairment      | Psychiatric changes, involuntary movement                                                                            | premature ovarian failure                             | Novel | LP            |
|          |                | c.965G>A                    | p.R322H       | Het      |        |         |                           |                                                                                                                      |                                                       | Known | P             |
| 4        | <i>AARS2</i>   | c.802A>G                    | p.M268V       | Het      | M      | 3m      | Delayed motor development | cognitive impairment, psychiatric symptoms, ataxia, pyramidal signs, tremor, nystagmus, dysarthria                   | No                                                    | Known | P             |
|          |                | c.1871G>A                   | p.W624*       | Het      |        |         |                           |                                                                                                                      |                                                       | Known | P             |
| 5        | <i>DARS2</i>   | c.213G>T                    | p.W71C        | Het      | F      | infancy | Delayed motor development | Ataxia, dysarthria, cognitive decline, pyramidal signs, deep sensory disturbance, peripheral neuropathy              | Visual impairment                                     | Novel | LP            |
|          |                | c.228-16C>A                 | -             | Het      |        |         |                           |                                                                                                                      |                                                       | Known | P             |
| 6        | <i>Mt-DNA</i>  | Mt-DNA: ND2 deletion        | -             | -        | M      | 15      | Cognitive impairment      | Fatigability                                                                                                         | No                                                    | Known | P             |
| 7        | <i>Mt-DNA</i>  | Mt DNA: 8284_14751del       | -             | -        | M      | 8       | Sensorineural deafness    | Cognitive impairment, psychiatric changes, epilepsy, dysarthria, ataxia, fatigability, tremor, peripheral neuropathy | Arrhythmia (left bundle branch block)                 | Known | P             |
| 8        | <i>Mt-DNA</i>  | Mt-ND3: 10197G>A            | -             | -        | M      | 15      | Diplopia                  | Dystonia, rigidity, dysarthria, ataxia, fatigability, cognitive impairment, myopathy                                 | No                                                    | Known | P             |
| 9        | <i>POLR3A</i>  | c.2564G>A                   | p.R855Q       | Het      | F      | Infancy | Progressive ataxia        | Spastic paraplegia, dysarthria                                                                                       | Poor pubertal development                             | Novel | LP            |
|          |                | c.1771-6C>G                 | -             | Het      |        |         |                           |                                                                                                                      |                                                       | Known | P             |
| 10       | <i>POLR3A</i>  | c.3407G>A                   | p.R1136Q      | Het      | M      | Infancy | Progressive ataxia        | Mental retardation, pyramidal signs, dysarthria                                                                      | Oligodontia, short stature, poor pubertal development | Known | P             |
|          |                | c.1771-7C>G                 | -             | Het      |        |         |                           |                                                                                                                      |                                                       | Known | P             |
| 11       | <i>SPG11</i>   | c.2531_2534delAACA          | p.K844Rfs*7   | Het      | M      | 15      | Spastic paraplegia        | dysarthria                                                                                                           | No                                                    | Novel | P             |
|          |                | c.7151+4_7151+7delAGTA      | -             | Het      |        |         |                           |                                                                                                                      |                                                       | Novel | LP            |
| 12       | <i>SPG11</i>   | c.4307_4308delAA            | p.Q1436Rfs*7  | Hom      | M      | 16      | Spastic paraplegia        | No                                                                                                                   | No                                                    | Known | P             |
| 13       | <i>SPG11</i>   | c.2480_2481insT             | p.K827Nfs*11  | Het      | F      | 12      | Spastic paraplegia        | dysarthria                                                                                                           | No                                                    | Novel | P             |
|          |                | c.2757delT                  | p.L920*       | Het      |        |         |                           |                                                                                                                      |                                                       | Novel | P             |
| 14       | <i>SPG11</i>   | c.6739_6742delGAGT          | p.E2247Lfs*14 | Hom      | M      | 12      | Spastic quadriplegia      | Cognitive impairment, dysarthria, extrapyramidal signs, bladder dysfunction                                          | Strabismus                                            | Known | P             |
| 15       | <i>SPG11</i>   | c.2123dupT                  | p.R709Qfs*3   | Het      | M      | 15      | Spastic paraplegia        | Dysarthria                                                                                                           | No                                                    | Novel | P             |
|          |                | c.4636-2A>G                 | -             | Het      |        |         |                           |                                                                                                                      |                                                       | Novel | P             |
| 16       | <i>ZFYVE26</i> | c.4278G>A                   | p.W1426*      | Het      | M      | 14      | Spastic paraplegia        | Cognitive impairment, psychiatric symptoms, bladder dysfunction, peripheral neuropathy                               | No                                                    | Novel | P             |
|          |                | c.4804C>T                   | p.R1602*      | Het      |        |         |                           |                                                                                                                      |                                                       | Known | P             |
| 17       | <i>ZFYVE26</i> | c.6498C>A                   | p.Y2166*      | Het      | M      | 14      | Spastic paraplegia        | Peripheral neuropathy                                                                                                | No                                                    | Novel | P             |
|          |                | c.6588+1G>A                 | -             | Het      |        |         |                           |                                                                                                                      |                                                       | Novel | P             |
| 18       | <i>SPG7</i>    | E1-E3 deletion              | -             | Hom      | F      | 56      | Spastic paraplegia        | Psychiatric symptoms                                                                                                 | No                                                    | Novel | P             |
| 19       | <i>RNF216</i>  | c.1549C>T                   | p.R517*       | Hom      | M      | 26      | Ataxia                    | Dysarthria, cognitive impairment                                                                                     | Hypogonadotropic hypogonadism                         | Novel | P             |
| 20       | <i>HEXB</i>    | c.1514G>A                   | p.R505Q       | Het      | F      | 23      | Weakness of limbs         | No                                                                                                                   | No                                                    | Known | P             |
|          |                | c.1614-9_1619TATCTACAGACGTG | -             | Het      |        |         |                           |                                                                                                                      |                                                       | Novel | P             |

|    |             | G                           |        |     |   |    |                                              |                                                          |                                                                       |       |    |
|----|-------------|-----------------------------|--------|-----|---|----|----------------------------------------------|----------------------------------------------------------|-----------------------------------------------------------------------|-------|----|
| 21 | <i>IDS</i>  | c.265G>C                    | p.V89L | Hem | M | 8  | Recurrent upper respiratory tract infections | No                                                       | Abdominal protuberance, macrocephaly, skeletal deformities, amblyopia | Novel | LP |
| 22 | <i>DMPK</i> | Numbers of CTG Repeat: >100 | -      | het | M | 27 | Myotonic myopathy                            | Cognitive impairment, dysarthria, Sensorineural deafness | Strabismus, alopecia                                                  |       |    |
| 23 | <i>DMPK</i> | Numbers of CTG Repeat: >100 | -      | het | M | 15 | Myotonic myopathy                            | Cognitive impairment, sensorineural deafness             | Cataract, alopecia                                                    |       |    |
| 24 | <i>DMPK</i> | Numbers of CTG Repeat: >100 | -      | het | M | 20 | Myotonic myopathy                            | Cognitive impairment, dysarthria                         | Alopecia                                                              |       |    |

AA changes = amino acid changes; AAO = age of onset; F = female; M = male; HGMD = Human Gene Mutation Database; LP = likely pathogenic; P = pathogenic.

**Supplementary Table 11: Clinical and genetic features of patients with heterozygous mutations in *CSF1R* gene identified in our cohort**

| Patients | Nucleotide changes | AA changes   | Genotype | Exon | Gender | AAO | Initial symptoms     | Cognitive impairment | Psychiatric symptoms | Ataxia | Parkinsonism | Pyramidal sign | Other symptoms                    | HGMD  | Pathogenicity |
|----------|--------------------|--------------|----------|------|--------|-----|----------------------|----------------------|----------------------|--------|--------------|----------------|-----------------------------------|-------|---------------|
| 1        | c.2294G>A          | p.G765D      | Het      | 17   | F      | 53  | Cognitive impairment | +                    | +                    | +      | -            | +              | Bladder dysfunction               | Known | LP            |
| 2        | c.2308G>A          | p.A770T      | Het      | 17   | M      | 24  | Spastic paraplegia   | -                    | -                    | -      | -            | +              | Dysarthria, incontinence          | Novel | LP            |
| 3        | c.2330G>A          | p.R777Q      | Het      | 17   | M      | 30  | Hemianesthesia       | -                    | -                    | -      | -            | +              | Dysarthria, dysphagia, hemiplegia | Known | LP            |
| 4        | c.2344C>T          | p.R782C      | Het      | 18   | F      | 43  | Cognitive impairment | +                    | -                    | +      | +            | -              | No                                | Known | LP            |
| 5        | c.2381T>C          | p.I794T      | Het      | 18   | M      | 27  | Spastic hemiplegia   | -                    | -                    | -      | -            | +              | Dysarthria, Bladder dysfunction   | Known | P             |
| 6        | c.2381T>C          | p.I794T      | Het      | 18   | M      | 35  | Cognitive impairment | +                    | -                    | -      | -            | +              | Dysarthria                        | Known | P             |
| 7        | c.2381T>C          | p.I794T      | Het      | 18   | M      | 39  | Psychiatric changes  | +                    | +                    | -      | -            | +              | Dysphagia                         | Known | LP            |
| 8        | c.2466G>A          | p.M822I      | Het      | 19   | F      | 30  | Ataxia               | +                    | +                    | +      | -            | +              | No                                | Known | P             |
| 9        | c.2468C>A          | p.A823D      | Het      | 19   | M      | 44  | Ataxia               | -                    | +                    | +      | +            | +              | Dysarthria, dysphagia             | Known | LP            |
| 10       | c.2468C>T          | p.A823V      | Het      | 19   | M      | 38  | Cognitive impairment | +                    | -                    | -      | -            | +              | No                                | Known | P             |
| 11       | c.2528T>C          | p.I843T      | Het      | 19   | F      | 43  | Ataxia               | +                    | +                    | +      | -            | +              | Bladder dysfunction               | Novel | LP            |
| 12       | c.2552T>C          | p.L851P      | Het      | 19   | F      | 24  | Ataxia               | +                    | +                    | +      | -            | +              | Dysarthria                        | Known | P             |
| 13       | c.2695_2696insC    | p.H899Pfs*43 | Het      | 21   | M      | 49  | Cognitive impairment | +                    | -                    | +      | -            | -              | Bladder dysfunction               | Novel | LP            |
| 14       | c.2701C>T          | p.P901S      | Het      | 21   | F      | 37  | Ataxia               | +                    | -                    | +      | -            | +              | No                                | Known | LP            |

AA changes = amino acid changes; AAO = age of onset; F = female; M = male; HGMD = Human Gene Mutation Database; LP = likely pathogenic; P = pathogenic; - = absent; + = present.

**Supplementary Table 12: Clinical and genetic features of astrocytopathies patients identified in our cohort**

| Patients | Gene          | Nucleotide changes | AA changes   | Genot type | Gender | AAO     | Initial symptoms                                 | Other neurological symptoms                                                                                           | Extraneurological symptoms                           | HGMD  | Pathogenicity |
|----------|---------------|--------------------|--------------|------------|--------|---------|--------------------------------------------------|-----------------------------------------------------------------------------------------------------------------------|------------------------------------------------------|-------|---------------|
| 1        | <i>EIF2B2</i> | c.3G>T             | p.M1?        | Hom        | M      | infancy | Mental retardation                               | Epilepsy, dysarthria, ataxia, headache                                                                                | No                                                   | Novel | P             |
| 2        | <i>EIF2B3</i> | c.1261A>T          | p.I421F      | Het        | F      | 31      | Ataxia                                           | Cognitive impairment, psychiatric symptoms, spastic paraplegia, tremor                                                | Optic atrophy, premature ovarian failure             | Novel | US            |
|          |               | c.686T>G           | p.I229S      | Het        |        |         |                                                  |                                                                                                                       |                                                      | Novel | LP            |
| 3        | <i>EIF2B3</i> | c.130G>A           | p.E44K       | Het        | F      | 41      | Psychiatric symptoms                             | Cognitive impairment, spastic paraplegia, ataxia, deterioration following head trauma                                 | Optic atrophy, somnolence, premature ovarian failure | Known | LP            |
|          |               | c.965C>G           | p.A322G      | Het        |        |         |                                                  |                                                                                                                       |                                                      | Known | LP            |
| 4        | <i>EIF2B4</i> | c.882+2T>G         | -            | Het        | M      | 7       | Ataxia                                           | Spastic quadriplegia, cognitive impairment, nystagmus, bladder dysfunction, rapid deterioration following head trauma | No                                                   | Novel | P             |
|          |               | c.1334G>A          | p.R445H      | Het        | Known  |         |                                                  |                                                                                                                       |                                                      | P     |               |
| 5        | <i>EIF2B5</i> | c.1025T>C          | p.I342T      | Het        | F      | infancy | Mental retardation                               | Spastic quadriplegia, ataxia, dysarthria, hemianesthesia, incontinence                                                | Optic atrophy                                        | Novel | LP            |
|          |               | c.1054C>T          | p.H352Y      | Het        | Novel  |         |                                                  |                                                                                                                       |                                                      | LP    |               |
| 6        | <i>EIF2B5</i> | c.1087G>A          | p.G363S      | Het        | F      | 41      | Headache                                         | Cognitive impairment, psychiatric symptoms, tremor, incontinence                                                      | Sleep disturbance, premature ovarian failure         | Novel | LP            |
|          |               | c.806G>A           | p.R269Q      | Het        | Known  |         |                                                  |                                                                                                                       |                                                      | P     |               |
| 7        | <i>GFAP</i>   | c.262C>T           | p.R88C       | Het        | F      | infancy | Delayed motor development                        | Dysarthria, ataxia, pyramidal signs                                                                                   | Sleep disturbance                                    | Known | P             |
| 8        | <i>GFAP</i>   | c.1246C>T          | p.R416W      | Het        | M      | 8       | Ataxia                                           | Pyramidal signs, palatal myoclonus, bladder dysfunction                                                               | Scoliosis                                            | Known | P             |
| 9        | <i>GFAP</i>   | c.1246C>T          | p.R416W      | Het        | F      | 19      | Ataxia                                           | Dysarthria, nystagmus, pyramidal signs, cognitive impairment, bladder dysfunction                                     | No                                                   | Known | P             |
| 10       | <i>LAMA2</i>  | c.439C>T           | p.P147S      | Hom        | M      | 30      | Epilepsy                                         | No                                                                                                                    | No                                                   | Novel | LP            |
| 11       | <i>LAMA2</i>  | c.437C>A           | p.S146Y      | Het        | M      | 13      | Progressive weakness of distal lower extremities | Epilepsy                                                                                                              | No                                                   | Known | P             |
|          |               | c.7186delG         | p.H2397Tfs*2 | Het        |        |         |                                                  |                                                                                                                       |                                                      | Novel | P             |
| 12       | <i>CLCN2</i>  | c.2507G>C          | p.R836P      | Hom        | M      | 41      | Severe headache                                  | No                                                                                                                    | No                                                   | Novel | LP            |

AA changes = amino acid changes; AAO = age of onset; F = female; M = male; HGMD = Human Gene Mutation Database; LP = likely pathogenic; P = pathogenic; US = uncertain significance.



**Supplementary Figure 1 The imaging appearance of the patient with LBSL.** (A-D) Axial T2-weighted MRI images showed hyperintensity in the medullary pyramids (A), middle cerebellar peduncles (B), cerebellar dentate nucleus (C), and cerebellar vermis (D), which was hyperintense on diffusion weighted imaging and isointense or hypointense on apparent diffusion coefficient. (E-F, I-J) T2-weighted and FLAIR imaging showed symmetric hyperintensities in periventricular white matter. Multiple punctate hyperintensities on DWI were distributed in periventricular white matter (G, K), which were hypointense on ADC (H, L). ADC: apparent diffusion coefficient; DWI: diffusion weighted imaging; FLAIR: fluid-attenuated inversion recovery images; LBSL: leukoencephalopathy with brain stem and spinal cord involvement and lactate elevation.

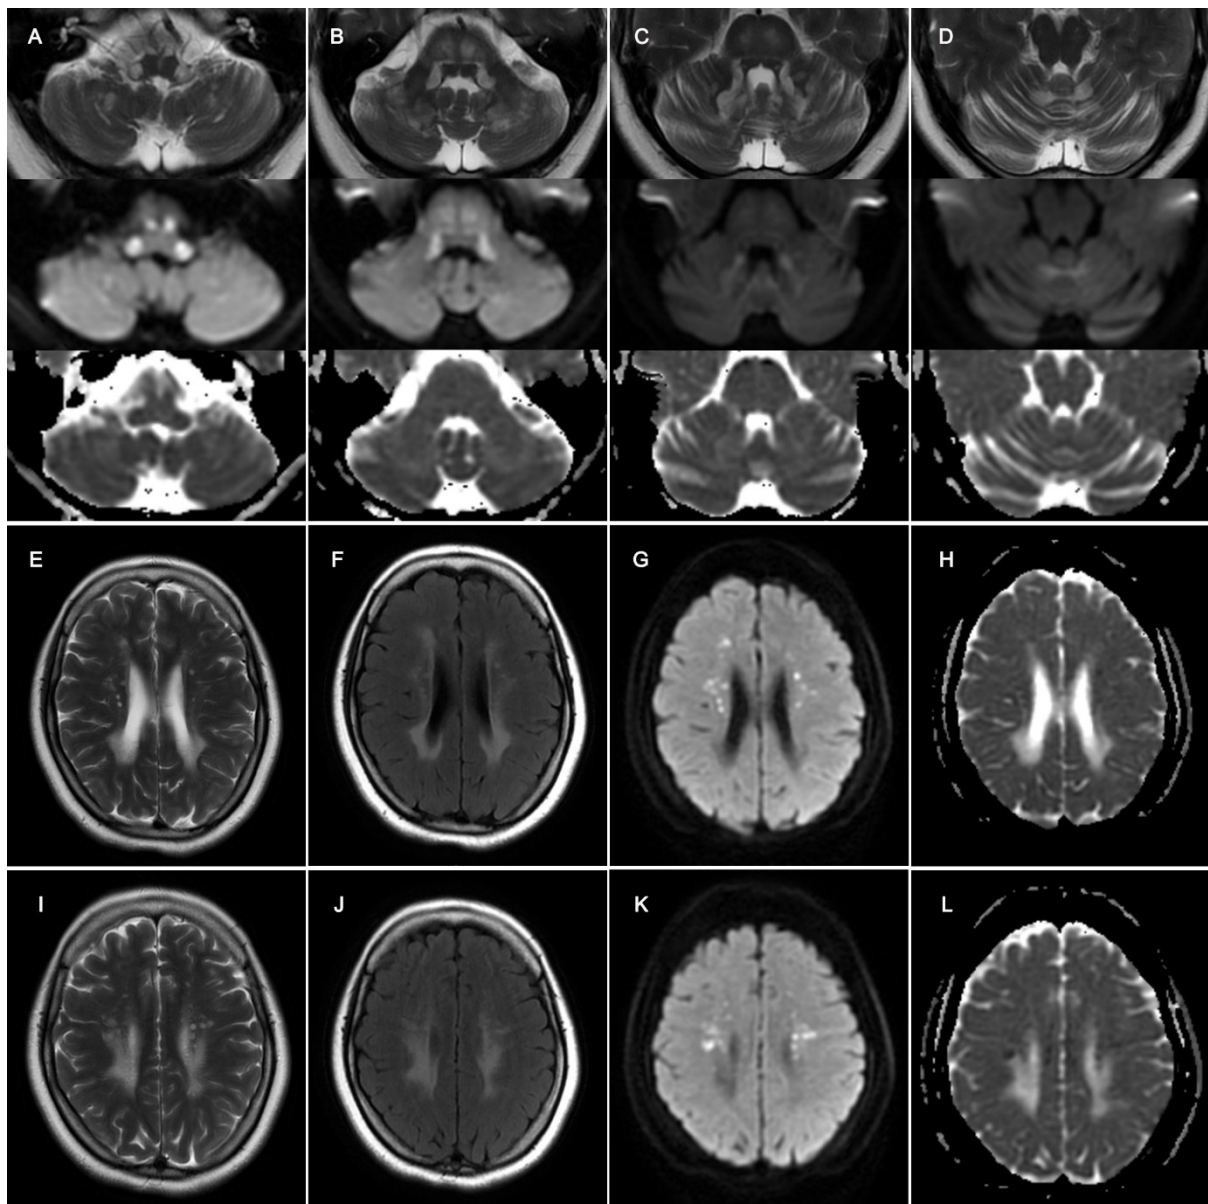

**Supplementary Figure 2 Punctate diffusion restriction in patients with LBSL, ALSP, and AARS2-related leukodystrophy.** (A-D) Imaging appearance of LBSL. (E-H) Imaging appearance of ALSP. (I-L) Imaging appearance of AARS2-related leukodystrophy. The punctate diffusion restriction changes in the periventricular white matter appear similar among LBSL, ALSP, and AARS2-related leukodystrophy. ALSP: adult-onset leukoencephalopathy with axonal spheroids and pigmented glia; LBSL: leukoencephalopathy with brain stem and spinal cord involvement and lactate elevation.

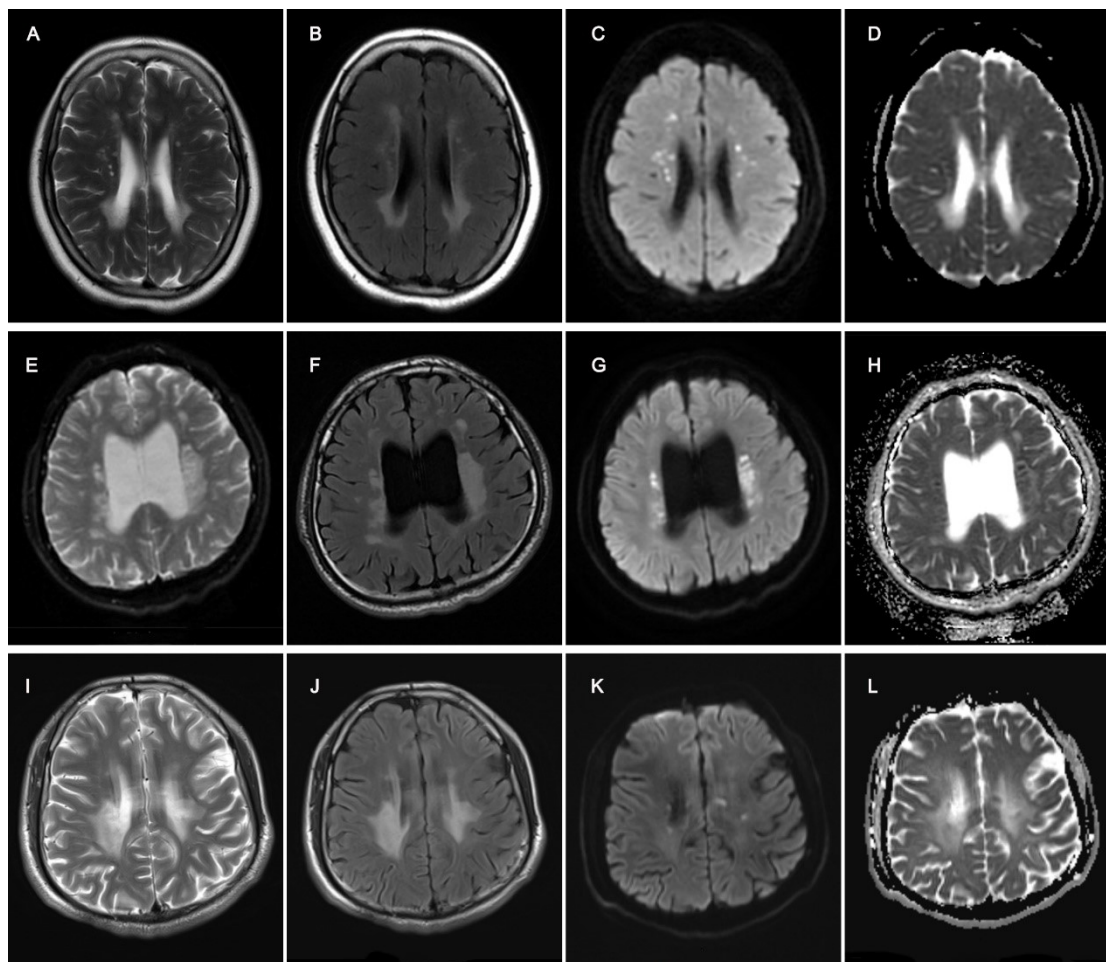

Supplement: awac426_supplementary_data.pdf [file awac426_supplementary_data.pdf]
